# Supplementary material for: Assessing the sensitivity of placental growth factor and soluble fms-like tyrosine kinase 1 at 36 weeks’ gestation to predict small-for-gestational-age infants or late-onset preeclampsia: a prospective nested case-control study
Source: BMC Pregnancy Childbirth. 2018 Aug 31;18:354. doi: 10.1186/s12884-018-1992-x (PMC6119271; doi:10.1186/s12884-018-1992-x)
Supplement: Supplementary file 2 — S2. Study data. (XLSX 104 kb) [file 12884_2018_1992_MOESM2_ESM.xlsx]

## Sheet: 105 SGA cases blue=preeclampsia
Age (years)	Parity	Smoking status	Informed Consent	sFlt-1	PlGF	sFlt1/PlGF	BMI at booking	Completed 36 week blood test	Gestation at 36/40 bloods days	Gestation at 36 FLAG blood test in weeks	Changed hypertension status since 28/40	Gestational Diabetes this pregnancy	Gestation at delivery in days	Gestation at delivery in weeks	Onset of delivery	Mode of Delivery (choice=NVD)	Mode of Delivery (choice=Instrumental for fetal distress)	Mode of Delivery (choice=Instrumental for FTP in S2)	Mode of Delivery (choice=Non-urgent C/S for failed IOL)	Mode of Delivery (choice=Em C/S for fetal distress)	Mode of Delivery (choice=Em C/S for dystocia)	Mode of Delivery (choice=Em C/S for planned C/S in labour or with SROM)	Mode of Delivery (choice=Elective C/S)	Mode of Delivery (choice=Instrumental delivery for maternal medical condition)	Complications (choice=Gestational Hypertension)	Complications (choice=Preeclampsia)	Complications (choice=HELLP)	Complications (choice=Eclampsia)	Complications (choice=Placental Abruption)	Birth Weight (kg)	Baby Gender	Birth weight centile	birth centile less than 10th
39	1	Current smoker	Yes	2432	116	20.9655	40.5	Yes	252	36	No	No	276	39.4286	Spont labour	Checked	Unchecked	Unchecked	Unchecked	Unchecked	Unchecked	Unchecked	Unchecked	Unchecked	Unchecked	Unchecked	Unchecked	Unchecked	Unchecked	2.04	Female	0	Yes
34	1	Ex-smoker	Yes	4327	148.6	29.1184	23.9	Yes	254	36.2857	No	No	276	39.4286	Induction of labour	Checked	Unchecked	Unchecked	Unchecked	Unchecked	Unchecked	Unchecked	Unchecked	Unchecked	Unchecked	Unchecked	Unchecked	Unchecked	Unchecked	2.41	Female	0.2	Yes
35	1	Never	Yes	10301	842.7	12.2238	21.5	Yes	247	35.2857	No	No	269	38.4286	No labour	Unchecked	Unchecked	Unchecked	Unchecked	Unchecked	Unchecked	Unchecked	Checked	Unchecked	Unchecked	Unchecked	Unchecked	Unchecked	Unchecked	2.09	Female	0.2	Yes
31	1	Never	Yes	1227	547.2	2.24232	21.6	Yes	257	36.7143	No	Yes	274	39.1429	No labour	Unchecked	Unchecked	Unchecked	Unchecked	Unchecked	Unchecked	Unchecked	Checked	Unchecked	Unchecked	Unchecked	Unchecked	Unchecked	Unchecked	2.11	Female	0.2	Yes
37	2	Never	Yes	4071	33.78	120.515	21.1	Yes	248	35.4286	No	No	252	36	No labour	Unchecked	Unchecked	Unchecked	Unchecked	Unchecked	Unchecked	Checked	Unchecked	Unchecked	Unchecked	Unchecked	Unchecked	Unchecked	Unchecked	1.96	Male	0.4	Yes
36	0	Never	Yes	4495	26.62	168.858	22.3	Yes	246	35.1429	No	No	268	38.2857	Induction of labour	Unchecked	Unchecked	Unchecked	Unchecked	Checked	Unchecked	Unchecked	Unchecked	Unchecked	Unchecked	Checked	Unchecked	Unchecked	Unchecked	2.32	Male	0.5	Yes
31	1	Never	Yes	2888	1321	2.18622	20.1	Yes	245	35	No	No	258	36.8571	No labour	Unchecked	Unchecked	Unchecked	Unchecked	Checked	Unchecked	Unchecked	Unchecked	Unchecked	Unchecked	Unchecked	Unchecked	Unchecked	Unchecked	1.97	Female	0.75	Yes
25	0	Never	Yes	2585	122.1	21.1712	37.8	Yes	250	35.7143	No	No	251	35.8571	No labour	Unchecked	Unchecked	Unchecked	Unchecked	Unchecked	Unchecked	Unchecked	Checked	Unchecked	Unchecked	Unchecked	Unchecked	Unchecked	Unchecked	2.02	Male	0.8	Yes
30	0	Never	Yes	4443	125.3	35.4589	26.3	Yes	253	36.1429	No	No	264	37.7143	Spont labour	Checked	Unchecked	Unchecked	Unchecked	Unchecked	Unchecked	Unchecked	Unchecked	Unchecked	Unchecked	Unchecked	Unchecked	Unchecked	Unchecked	2.22	Female	0.9	Yes
29	0	Never	Yes	7425	228.9	32.4377	29.7	Yes	251	35.8571	No	No	289	41.2857	Induction of labour	Unchecked	Checked	Unchecked	Unchecked	Unchecked	Unchecked	Unchecked	Unchecked	Unchecked	Unchecked	Unchecked	Unchecked	Unchecked	Unchecked	2.84	Male	1	Yes
40	1	Ex-smoker	Yes	4669	94.74	49.2822	22.9	Yes	257	36.7143	No	No	290	41.4286	No labour	Unchecked	Unchecked	Unchecked	Unchecked	Unchecked	Unchecked	Unchecked	Checked	Unchecked	Unchecked	Unchecked	Unchecked	Unchecked	Unchecked	2.88	Male	1.1	Yes
29	0	Ex-smoker	Yes	5741	60.85	94.3468	26.6	Yes	257	36.7143	No	No	272	38.8571	No labour	Unchecked	Unchecked	Unchecked	Unchecked	Unchecked	Unchecked	Unchecked	Checked	Unchecked	Unchecked	Unchecked	Unchecked	Unchecked	Unchecked	2.45	Female	1.1	Yes
35	0	Never	Yes	1683	161.1	10.4469	23.8	Yes	250	35.7143	No	No	268	38.2857	No labour	Unchecked	Unchecked	Unchecked	Unchecked	Unchecked	Unchecked	Unchecked	Checked	Unchecked	Checked	Unchecked	Unchecked	Unchecked	Unchecked	2.32	Female	1.5	Yes
32	1	Ex-smoker	Yes	1217	565	2.15398	41.9	Yes	258	36.8571	No	No	279	39.8571	Induction of labour	Unchecked	Checked	Unchecked	Unchecked	Unchecked	Unchecked	Unchecked	Unchecked	Unchecked	Unchecked	Unchecked	Unchecked	Unchecked	Unchecked	2.89	Female	1.6	Yes
31	0	Never	Yes	1691	167.1	10.1197	21.6	Yes	253	36.1429	No	No	261	37.2857	Induction of labour	Checked	Unchecked	Unchecked	Unchecked	Unchecked	Unchecked	Unchecked	Unchecked	Unchecked	Unchecked	Unchecked	Unchecked	Unchecked	Unchecked	2.22	Female	1.7	Yes
38	2	Never	Yes	2598	242.4	10.7178	21.2	Yes	247	35.2857	No	No	259	37	Spont labour	Checked	Unchecked	Unchecked	Unchecked	Unchecked	Unchecked	Unchecked	Unchecked	Unchecked	Unchecked	Unchecked	Unchecked	Unchecked	Unchecked	2.15	Female	1.8	Yes
33	0	Ex-smoker	Yes	3838	77.12	49.7666	21.9	Yes	252	36	No	No	262	37.4286	No labour	Unchecked	Unchecked	Unchecked	Unchecked	Unchecked	Unchecked	Unchecked	Checked	Unchecked	Unchecked	Unchecked	Unchecked	Unchecked	Unchecked	2.27	Male	1.9	Yes
34	0	Ex-smoker	Yes	2312	158	14.6329	20.8	Yes	253	36.1429	No	No	279	39.8571	Spont labour	Unchecked	Checked	Unchecked	Unchecked	Unchecked	Unchecked	Unchecked	Unchecked	Unchecked	Unchecked	Unchecked	Unchecked	Unchecked	Unchecked	2.67	Male	2	Yes
37	2	Current smoker	Yes	919.6	1241	0.741015	27.2	Yes	255	36.4286	No	No	265	37.8571	Induction of labour	Checked	Unchecked	Unchecked	Unchecked	Unchecked	Unchecked	Unchecked	Unchecked	Unchecked	Unchecked	Unchecked	Unchecked	Unchecked	Unchecked	2.52	Male	2.1	Yes
22	1	Current smoker	Yes	2603	408.2	6.37678	22.9	Yes	251	35.8571	No	No	281	40.1429	Spont labour	Checked	Unchecked	Unchecked	Unchecked	Unchecked	Unchecked	Unchecked	Unchecked	Unchecked	Unchecked	Unchecked	Unchecked	Unchecked	Unchecked	2.82	Male	2.1	Yes
33	0	Never	Yes	3895	123.6	31.5129	23.7	Yes	256	36.5714	No	No	275	39.2857	Induction of labour	Checked	Unchecked	Unchecked	Unchecked	Unchecked	Unchecked	Unchecked	Unchecked	Unchecked	Unchecked	Unchecked	Unchecked	Unchecked	Unchecked	2.67	Male	2.1	Yes
35	0	Never	Yes	6671	42.25	157.893	33.2	Yes	256	36.5714	No	Yes	269	38.4286	Induction of labour	Unchecked	Unchecked	Unchecked	Unchecked	Checked	Unchecked	Unchecked	Unchecked	Unchecked	Checked	Unchecked	Unchecked	Unchecked	Unchecked	2.48	Female	2.2	Yes
29	0	Never	Yes	12169	110.2	110.426	32	Yes	252	36	No	Yes	258	36.8571	Induction of labour	Unchecked	Unchecked	Unchecked	Unchecked	Checked	Checked	Unchecked	Unchecked	Unchecked	Unchecked	Unchecked	Unchecked	Unchecked	Unchecked	2.24	Male	2.4	Yes
26	1	Current smoker	Yes	1235	570.5	2.16477	30.4	Yes	254	36.2857	No	No	280	40	Induction of labour	Checked	Unchecked	Unchecked	Unchecked	Unchecked	Unchecked	Unchecked	Unchecked	Unchecked	Unchecked	Unchecked	Unchecked	Unchecked	Unchecked	3	Male	2.6	Yes
37	2	Current smoker	Yes	933.5	644.4	1.44863	34.3	Yes	248	35.4286	No	No	271	38.7143	No labour	Unchecked	Unchecked	Unchecked	Unchecked	Unchecked	Unchecked	Unchecked	Checked	Unchecked	Unchecked	Unchecked	Unchecked	Unchecked	Unchecked	2.76	Female	2.6	Yes
33	1	Ex-smoker	Yes	1789	202.6	8.83021	24.6	Yes	258	36.8571	No	Yes	274	39.1429	Spont labour	Checked	Unchecked	Unchecked	Unchecked	Unchecked	Unchecked	Unchecked	Unchecked	Unchecked	Checked	Unchecked	Unchecked	Unchecked	Unchecked	2.58	Female	2.7	Yes
36	0	Never	Yes	2254	108.3	20.8126	28.5	Yes	253	36.1429	Gestational Hypertension	No	276	39.4286	Induction of labour	Unchecked	Checked	Unchecked	Unchecked	Unchecked	Unchecked	Unchecked	Unchecked	Unchecked	Checked	Unchecked	Unchecked	Unchecked	Unchecked	2.68	Male	2.7	Yes
25	0	Never	Yes	3093	1138	2.71793	19.2	Yes	252	36	No	No	283	40.4286	Induction of labour	Checked	Unchecked	Unchecked	Unchecked	Unchecked	Unchecked	Unchecked	Unchecked	Unchecked	Unchecked	Unchecked	Unchecked	Unchecked	Unchecked	2.75	Male	2.9	Yes
37	1	Never	Yes	3528	249.4	14.146	24.4	Yes	252	36	No	Yes	272	38.8571	Induction of labour	Checked	Unchecked	Unchecked	Unchecked	Unchecked	Unchecked	Unchecked	Unchecked	Unchecked	Unchecked	Unchecked	Unchecked	Unchecked	Unchecked	2.65	Female	3.2	Yes
28	0	Ex-smoker	Yes	2950	314.1	9.39191	26.4	Yes	255	36.4286	No	Yes	260	37.1429	Induction of labour	Unchecked	Checked	Unchecked	Unchecked	Unchecked	Unchecked	Unchecked	Unchecked	Unchecked	Unchecked	Unchecked	Unchecked	Unchecked	Unchecked	2.24	Female	3.4	Yes
25	0	Never	Yes	11666	48.39	241.083	30.5	Yes	248	35.4286	Preeclampsia	No	261	37.2857	Induction of labour	Unchecked	Unchecked	Unchecked	Unchecked	Checked	Checked	Unchecked	Unchecked	Unchecked	Unchecked	Checked	Unchecked	Unchecked	Unchecked	2.39	Female	3.4	Yes
28	0	Ex-smoker	Yes	2539	267.6	9.48804	26.3	Yes	251	35.8571	No	No	283	40.4286	Induction of labour	Checked	Unchecked	Unchecked	Unchecked	Unchecked	Unchecked	Unchecked	Unchecked	Unchecked	Checked	Unchecked	Unchecked	Unchecked	Unchecked	2.85	Female	3.5	Yes
24	0	Never	Yes	3531	79.24	44.5608	19.4	Yes	259	37	No	No	288	41.1429	Induction of labour	Checked	Unchecked	Unchecked	Unchecked	Unchecked	Unchecked	Unchecked	Unchecked	Unchecked	Unchecked	Unchecked	Unchecked	Unchecked	Unchecked	2.83	Female	3.7	Yes
34	1	Never	Yes	4340	58.04	74.776	31.6	Yes	257	36.7143	No	No	284	40.5714	Spont labour	Checked	Unchecked	Unchecked	Unchecked	Unchecked	Unchecked	Unchecked	Unchecked	Unchecked	Unchecked	Unchecked	Unchecked	Unchecked	Unchecked	3.09	Male	3.8	Yes
37	1	Never	Yes	3099	358.3	8.64918	23.7	Yes	258	36.8571	No	Yes	266	38	No labour	Unchecked	Unchecked	Unchecked	Unchecked	Unchecked	Unchecked	Unchecked	Checked	Unchecked	Unchecked	Unchecked	Unchecked	Unchecked	Unchecked	2.58	Male	3.8	Yes
26	0	Never	Yes	2571	167.3	15.3676	20	Yes	254	36.2857	No	No	262	37.4286	Induction of labour	Checked	Unchecked	Unchecked	Unchecked	Unchecked	Unchecked	Unchecked	Unchecked	Unchecked	Unchecked	Unchecked	Unchecked	Unchecked	Unchecked	2.38	Male	3.8	Yes
27	0	Never	Yes	2535	193.9	13.0737	21.8	Yes	254	36.2857	No	No	265	37.8571	Induction of labour	Checked	Unchecked	Unchecked	Unchecked	Unchecked	Unchecked	Unchecked	Unchecked	Unchecked	Unchecked	Unchecked	Unchecked	Unchecked	Unchecked	2.36	Male	3.8	Yes
35	1	Never	Yes	1835	203	9.03941	39.4	Yes	254	36.2857	No	Yes	272	38.8571	Spont labour	Unchecked	Unchecked	Unchecked	Unchecked	Unchecked	Unchecked	Checked	Unchecked	Unchecked	Unchecked	Unchecked	Unchecked	Unchecked	Checked	2.74	Female	3.9	Yes
34	0	Never	Yes	8607	33.13	259.795	23.7	Yes	251	35.8571	Preeclampsia	No	252	36	No labour	Unchecked	Unchecked	Unchecked	Unchecked	Checked	Unchecked	Unchecked	Unchecked	Unchecked	Unchecked	Checked	Unchecked	Unchecked	Unchecked	2.03	Female	4	Yes
38	2	Ex-smoker	Yes	6230	60.01	103.816	47.8	Yes	250	35.7143	Preeclampsia	Yes	259	37	No labour	Unchecked	Unchecked	Unchecked	Unchecked	Unchecked	Unchecked	Unchecked	Checked	Unchecked	Unchecked	Checked	Unchecked	Unchecked	Unchecked	2.59	Female	4.1	Yes
25	0	Never	Yes	7109	32.11	221.395	24.1	Yes	256	36.5714	Gestational Hypertension	No	260	37.1429	Induction of labour	Unchecked	Checked	Unchecked	Unchecked	Unchecked	Unchecked	Unchecked	Unchecked	Unchecked	Checked	Unchecked	Unchecked	Unchecked	Unchecked	2.45	Male	4.2	Yes
32	1	Ex-smoker	Yes	1284	840.9	1.52694	32.1	Yes	245	35	No	No	276	39.4286	Spont labour	Checked	Unchecked	Unchecked	Unchecked	Unchecked	Unchecked	Unchecked	Unchecked	Unchecked	Unchecked	Unchecked	Unchecked	Unchecked	Unchecked	2.93	Female	4.3	Yes
29	0	Ex-smoker	Yes	2545	199.9	12.7314	20.7	Yes	252	36	No	No	280	40	Spont labour	Unchecked	Checked	Unchecked	Unchecked	Unchecked	Unchecked	Unchecked	Unchecked	Unchecked	Checked	Unchecked	Unchecked	Unchecked	Unchecked	2.88	Male	4.3	Yes
30	0	Never	Yes	2164	480.6	4.5027	21.9	Yes	249	35.5714	No	No	283	40.4286	Spont labour	Unchecked	Checked	Unchecked	Unchecked	Unchecked	Unchecked	Unchecked	Unchecked	Unchecked	Unchecked	Unchecked	Unchecked	Unchecked	Unchecked	2.85	Male	4.6	Yes
28	2	Never	Yes	2275	132.3	17.1958	33.7	Yes	253	36.1429	No	No	269	38.4286	No labour	Unchecked	Unchecked	Unchecked	Unchecked	Unchecked	Unchecked	Unchecked	Checked	Unchecked	Unchecked	Unchecked	Unchecked	Unchecked	Unchecked	2.93	Male	4.7	Yes
28	0	Never	Yes	3988	142.2	28.045	20.4	Yes	251	35.8571	No	No	278	39.7143	Induction of labour	Unchecked	Unchecked	Unchecked	Unchecked	Checked	Checked	Unchecked	Unchecked	Unchecked	Unchecked	Checked	Unchecked	Unchecked	Unchecked	2.62	Female	4.7	Yes
30	0	Never	Yes	1084	817	1.32681	22.3	Yes	251	35.8571	No	No	252	36	No labour	Unchecked	Unchecked	Unchecked	Unchecked	Unchecked	Unchecked	Unchecked	Checked	Unchecked	Unchecked	Unchecked	Unchecked	Unchecked	Unchecked	2.21	Female	4.8	Yes
24	1	Ex-smoker	Yes	3074	68.7	44.7453	30.1	Yes	257	36.7143	No	No	285	40.7143	Spont labour	Checked	Unchecked	Unchecked	Unchecked	Unchecked	Unchecked	Unchecked	Unchecked	Unchecked	Unchecked	Unchecked	Unchecked	Unchecked	Unchecked	3.24	Male	5	Yes
36	1	Never	Yes	1632	571.3	2.85664	22.9	Yes	247	35.2857	No	No	267	38.1429	Spont labour	Checked	Unchecked	Unchecked	Unchecked	Unchecked	Unchecked	Unchecked	Unchecked	Unchecked	Unchecked	Unchecked	Unchecked	Unchecked	Unchecked	2.61	Female	5.1	Yes
36	1	Ex-smoker	Yes	2535	372.8	6.79989	20	Yes	252	36	No	Yes	268	38.2857	No labour	Unchecked	Unchecked	Unchecked	Unchecked	Unchecked	Unchecked	Unchecked	Checked	Unchecked	Unchecked	Unchecked	Unchecked	Unchecked	Unchecked	2.69	Male	5.1	Yes
34	1	Never	Yes	2675	84.85	31.5262	28.3	Yes	257	36.7143	No	Yes	261	37.2857	Spont labour	Checked	Unchecked	Unchecked	Unchecked	Unchecked	Unchecked	Unchecked	Unchecked	Unchecked	Unchecked	Unchecked	Unchecked	Unchecked	Unchecked	2.61	Male	5.2	Yes
31	0	Never	Yes	5273	68.77	76.6759	26.6	Yes	251	35.8571	No	No	280	40	Spont labour	Checked	Unchecked	Unchecked	Unchecked	Unchecked	Unchecked	Unchecked	Unchecked	Unchecked	Unchecked	Unchecked	Unchecked	Unchecked	Unchecked	2.92	Male	5.2	Yes
28	0	Ex-smoker	Yes	7848	47.88	163.91	25.1	Yes	259	37	No	No	275	39.2857	Spont labour	Checked	Unchecked	Unchecked	Unchecked	Unchecked	Unchecked	Unchecked	Unchecked	Unchecked	Unchecked	Unchecked	Unchecked	Unchecked	Unchecked	2.87	Male	5.6	Yes
28	0	Never	Yes	4099	123	33.3252	17.9	Yes	250	35.7143	No	No	253	36.1429	Induction of labour	Checked	Unchecked	Unchecked	Unchecked	Unchecked	Unchecked	Unchecked	Unchecked	Unchecked	Unchecked	Unchecked	Unchecked	Unchecked	Unchecked	2.27	Male	5.8	Yes
32	0	Never	Yes	5926	92.9	63.789	24.8	Yes	255	36.4286	Gestational Hypertension	No	265	37.8571	Induction of labour	Unchecked	Unchecked	Unchecked	Unchecked	Checked	Unchecked	Unchecked	Unchecked	Unchecked	Checked	Unchecked	Unchecked	Unchecked	Unchecked	2.59	Female	6.2	Yes
26	0	Never	Yes	3511	105.7	33.2167	24	Yes	252	36	No	No	291	41.5714	Spont labour	Unchecked	Unchecked	Unchecked	Unchecked	Checked	Unchecked	Unchecked	Unchecked	Unchecked	Unchecked	Unchecked	Unchecked	Unchecked	Unchecked	3	Female	6.3	Yes
33	0	Ex-smoker	Yes	1687	391.4	4.31017	23.6	Yes	249	35.5714	No	No	276	39.4286	Induction of labour	Checked	Unchecked	Unchecked	Unchecked	Unchecked	Unchecked	Unchecked	Unchecked	Unchecked	Unchecked	Unchecked	Unchecked	Unchecked	Unchecked	2.76	Female	6.3	Yes
32	0	Never	Yes	1529	1775	0.861408	24.3	Yes	256	36.5714	No	Yes	274	39.1429	Induction of labour	Unchecked	Unchecked	Checked	Unchecked	Unchecked	Unchecked	Unchecked	Unchecked	Unchecked	Unchecked	Unchecked	Unchecked	Unchecked	Unchecked	2.72	Male	6.5	Yes
35	0	Never	Yes	Insufficient due to instrument error	249.9	#VALUE!	31.6	Yes	249	35.5714	No	Yes	280	40	Induction of labour	Checked	Unchecked	Unchecked	Unchecked	Unchecked	Unchecked	Unchecked	Unchecked	Unchecked	Unchecked	Unchecked	Unchecked	Unchecked	Unchecked	2.95	Male	6.6	Yes
30	0	Ex-smoker	Yes	1812	144.2	12.5659	20.3	Yes	253	36.1429	No	No	279	39.8571	Induction of labour	Unchecked	Checked	Unchecked	Unchecked	Unchecked	Unchecked	Unchecked	Unchecked	Unchecked	Unchecked	Unchecked	Unchecked	Unchecked	Unchecked	2.7	Female	6.6	Yes
30	0	Ex-smoker	Yes	7935	53.51	148.29	24.4	Yes	253	36.1429	Preeclampsia	No	259	37	Spont labour	Checked	Unchecked	Unchecked	Unchecked	Unchecked	Unchecked	Unchecked	Unchecked	Unchecked	Unchecked	Checked	Checked	Unchecked	Unchecked	2.34	Female	6.6	Yes
37	1	Never	Yes	1115	705.6	1.58022	21.2	Yes	255	36.4286	No	No	287	41	Spont labour	Checked	Unchecked	Unchecked	Unchecked	Unchecked	Unchecked	Unchecked	Unchecked	Unchecked	Unchecked	Unchecked	Unchecked	Unchecked	Unchecked	3.15	Female	6.8	Yes
30	0	Ex-smoker	Yes	4406	89.11	49.4445	29.4	Yes	255	36.4286	No	No	270	38.5714	Induction of labour	Checked	Unchecked	Unchecked	Unchecked	Unchecked	Unchecked	Unchecked	Unchecked	Unchecked	Unchecked	Unchecked	Unchecked	Unchecked	Unchecked	2.82	Male	6.8	Yes
33	0	Ex-smoker	Yes	4885	276.1	17.6929	22.1	Yes	257	36.7143	No	No	289	41.2857	Induction of labour	Unchecked	Unchecked	Unchecked	Unchecked	Checked	Checked	Unchecked	Unchecked	Unchecked	Checked	Unchecked	Unchecked	Unchecked	Unchecked	2.99	Female	6.9	Yes
35	1	Never	Yes	4182	104.5	40.0191	37.3	Yes	256	36.5714	No	No	279	39.8571	Spont labour	Unchecked	Unchecked	Unchecked	Unchecked	Unchecked	Checked	Unchecked	Unchecked	Unchecked	Checked	Unchecked	Unchecked	Unchecked	Unchecked	3.13	Male	6.95	Yes
36	0	Ex-smoker	Yes	1597	1246	1.2817	21.9	Yes	254	36.2857		No	269	38.4286	Induction of labour	Checked	Unchecked	Unchecked	Unchecked	Unchecked	Unchecked	Unchecked	Unchecked	Unchecked	Unchecked	Unchecked	Unchecked	Unchecked	Unchecked	2.62	Female	7	Yes
28	0	Never	Yes	1437	272.9	5.26567	22.9	Yes	251	35.8571	No	No	289	41.2857	Induction of labour	Unchecked	Checked	Unchecked	Unchecked	Unchecked	Unchecked	Unchecked	Unchecked	Unchecked	Unchecked	Unchecked	Unchecked	Unchecked	Unchecked	3.06	Female	7	Yes
30	0	Never	Yes	2910	147.6	19.7154	19.1	Yes	256	36.5714	No	No	272	38.8571	Spont labour	Checked	Unchecked	Unchecked	Unchecked	Unchecked	Unchecked	Unchecked	Unchecked	Unchecked	Unchecked	Unchecked	Unchecked	Unchecked	Unchecked	2.57	Female	7.1	Yes
31	0	Ex-smoker	Yes	3093	99.61	31.0511	20.4	Yes	246	35.1429	No	No	288	41.1429	Induction of labour	Unchecked	Checked	Unchecked	Unchecked	Unchecked	Unchecked	Unchecked	Unchecked	Unchecked	Checked	Unchecked	Unchecked	Unchecked	Unchecked	3.12	Male	7.4	Yes
31	0	Never	Yes	2219	225	9.86222	18.6	Yes	254	36.2857	No	No	287	41	Spont labour	Unchecked	Unchecked	Checked	Unchecked	Unchecked	Unchecked	Unchecked	Unchecked	Unchecked	Unchecked	Unchecked	Unchecked	Unchecked	Unchecked	3.09	Male	7.4	Yes
32	4	Never	Yes	1844	241.9	7.62298	33.5	Yes	253	36.1429	No	No	272	38.8571	No labour	Unchecked	Unchecked	Unchecked	Unchecked	Unchecked	Unchecked	Unchecked	Checked	Unchecked	Unchecked	Unchecked	Unchecked	Unchecked	Unchecked	3	Male	7.7	Yes
27	1	Never	Yes	1677	129	13	26.3	Yes	251	35.8571	No	No	283	40.4286	Spont labour	Checked	Unchecked	Unchecked	Unchecked	Unchecked	Unchecked	Unchecked	Unchecked	Unchecked	Checked	Unchecked	Unchecked	Unchecked	Unchecked	3.13	Male	7.7	Yes
29	0	Ex-smoker	Yes	2635	218.5	12.0595	23.8	Yes	250	35.7143	No	No	273	39	Induction of labour	Checked	Unchecked	Unchecked	Unchecked	Unchecked	Unchecked	Unchecked	Unchecked	Unchecked	Unchecked	Unchecked	Unchecked	Unchecked	Unchecked	2.9	Male	7.7	Yes
34	1	Never	Yes	1634	416.5	3.92317	16.8	Yes	250	35.7143	No	Yes	260	37.1429	Induction of labour	Checked	Unchecked	Unchecked	Unchecked	Unchecked	Unchecked	Unchecked	Unchecked	Unchecked	Unchecked	Unchecked	Unchecked	Unchecked	Unchecked	2.36	Female	7.8	Yes
29	0	Never	Yes	3706	497.1	7.45524	19.1	Yes	252	36	No	No	263	37.5714	Induction of labour	Checked	Unchecked	Unchecked	Unchecked	Unchecked	Unchecked	Unchecked	Unchecked	Unchecked	Unchecked	Unchecked	Unchecked	Unchecked	Unchecked	2.45	Female	7.8	Yes
40	0	Current smoker	Yes	6417	129.5	49.5521	26.4	Yes	253	36.1429	No	No	270	38.5714	Spont labour	Unchecked	Unchecked	Unchecked	Unchecked	Checked	Unchecked	Unchecked	Unchecked	Unchecked	Unchecked	Unchecked	Unchecked	Unchecked	Unchecked	2.92	Male	8	Yes
31	1	Never	Yes	1620	817.8	1.98092	20.2	Yes	247	35.2857	No	No	271	38.7143	Induction of labour	Checked	Unchecked	Unchecked	Unchecked	Unchecked	Unchecked	Unchecked	Unchecked	Unchecked	Unchecked	Unchecked	Unchecked	Unchecked	Unchecked	2.62	Female	8	Yes
34	0	Never	Yes	5243	86.58	60.5567	21.4	Yes	252	36	No	No	272	38.8571	Induction of labour	Unchecked	Checked	Unchecked	Unchecked	Unchecked	Unchecked	Unchecked	Unchecked	Unchecked	Checked	Unchecked	Unchecked	Unchecked	Unchecked	2.58	Female	8	Yes
30	0	Never	Yes	2786	178	15.6517	21.9	Yes	257	36.7143	No	No	293	41.8571	Induction of labour	Unchecked	Unchecked	Unchecked	Unchecked	Checked	Unchecked	Unchecked	Unchecked	Unchecked	Unchecked	Unchecked	Unchecked	Unchecked	Unchecked	3.09	Female	8.2	Yes
36	1	Never	Yes	2248	394.7	5.69546	28.3	Yes	252	36	No	No	269	38.4286	Spont labour	Checked	Unchecked	Unchecked	Unchecked	Unchecked	Unchecked	Unchecked	Unchecked	Unchecked	Unchecked	Unchecked	Unchecked	Unchecked	Unchecked	2.91	Male	8.2	Yes
30	0	Never	Yes	3140	186.2	16.8636	28.8	Yes	251	35.8571	No	No	276	39.4286	Spont labour	Unchecked	Unchecked	Checked	Unchecked	Unchecked	Unchecked	Unchecked	Unchecked	Unchecked	Unchecked	Unchecked	Unchecked	Unchecked	Unchecked	2.89	Male	8.2	Yes
32	0	Never	Yes	1272	993.5	1.28032	21.8	Yes	254	36.2857	No	Yes	280	40	Induction of labour	Unchecked	Checked	Unchecked	Unchecked	Unchecked	Unchecked	Unchecked	Unchecked	Unchecked	Unchecked	Unchecked	Unchecked	Unchecked	Unchecked	2.9	Female	8.2	Yes
38	0	Never	Yes	Insufficient due to instrument error	123.4	#VALUE!	24.1	Yes	248	35.4286	No	No	285	40.7143	Spont labour	Unchecked	Unchecked	Unchecked	Unchecked	Checked	Unchecked	Unchecked	Unchecked	Unchecked	Unchecked	Unchecked	Unchecked	Unchecked	Unchecked	3.16	Male	8.5	Yes
36	6	Never	Yes	1682	265.4	6.3376	30.7	Yes	250	35.7143	No	No	273	39	Spont labour	Checked	Unchecked	Unchecked	Unchecked	Unchecked	Unchecked	Unchecked	Unchecked	Unchecked	Unchecked	Unchecked	Unchecked	Unchecked	Unchecked	2.98	Female	8.5	Yes
34	0	Never	Yes	2051	336.2	6.10054	29.2	Yes	256	36.5714	No	No	287	41	Spont labour	Unchecked	Checked	Unchecked	Unchecked	Unchecked	Unchecked	Unchecked	Unchecked	Unchecked	Unchecked	Unchecked	Unchecked	Unchecked	Unchecked	3.14	Male	8.5	Yes
38	1	Ex-smoker	Yes	3741	178.9	20.9111	23	Yes	254	36.2857	No	Yes	273	39	No labour	Unchecked	Unchecked	Unchecked	Unchecked	Unchecked	Unchecked	Unchecked	Checked	Unchecked	Unchecked	Unchecked	Unchecked	Unchecked	Unchecked	2.83	Female	8.6	Yes
30	0	Ex-smoker	Yes	3084	79.57	38.7583	40.7	Yes	246	35.1429	No	Yes	276	39.4286	Induction of labour	Unchecked	Unchecked	Unchecked	Unchecked	Checked	Unchecked	Unchecked	Unchecked	Unchecked	Unchecked	Checked	Unchecked	Unchecked	Unchecked	3.03	Male	8.6	Yes
40	0	Never	Yes	2236	157	14.242	30.1	Yes	245	35	No	No	286	40.8571	Induction of labour	Unchecked	Checked	Checked	Unchecked	Unchecked	Unchecked	Unchecked	Unchecked	Unchecked	Unchecked	Unchecked	Unchecked	Unchecked	Unchecked	3.2	Female	8.7	Yes
32	1	Never	Yes	3377	719.3	4.69484	19.8	Yes	256	36.5714	No	No	268	38.2857	Spont labour	Checked	Unchecked	Unchecked	Unchecked	Unchecked	Unchecked	Unchecked	Unchecked	Unchecked	Unchecked	Unchecked	Unchecked	Unchecked	Unchecked	2.7	Male	8.7	Yes
29	0	Never	Yes	2133	276.8	7.70592	17.1	Yes	256	36.5714	No	No	285	40.7143	Spont labour	Checked	Unchecked	Unchecked	Unchecked	Unchecked	Unchecked	Unchecked	Unchecked	Unchecked	Unchecked	Unchecked	Unchecked	Unchecked	Unchecked	2.84	Female	8.7	Yes
36	1	Never	Yes	2301	1039	2.21463	20.5	Yes	247	35.2857	No	No	249	35.5714	No labour	Unchecked	Unchecked	Unchecked	Unchecked	Unchecked	Unchecked	Checked	Unchecked	Unchecked	Unchecked	Unchecked	Unchecked	Unchecked	Unchecked	2.22	Male	8.8	Yes
37	1	Never	Yes	3801	103	36.9029	22.2	Yes	250	35.7143	No	No	257	36.7143	Spont labour	Unchecked	Unchecked	Unchecked	Unchecked	Checked	Unchecked	Unchecked	Unchecked	Unchecked	Unchecked	Unchecked	Unchecked	Unchecked	Unchecked	2.44	Female	8.8	Yes
33	1	Never	Yes	3143	139.6	22.5143	24.2	Yes	256	36.5714	No	No	277	39.5714	Spont labour	Checked	Unchecked	Unchecked	Unchecked	Unchecked	Unchecked	Unchecked	Unchecked	Unchecked	Unchecked	Unchecked	Unchecked	Unchecked	Unchecked	2.97	Male	8.8	Yes
31	0	Never	Yes	5596	506.4	11.0506	22.7	Yes	248	35.4286	No	Yes	271	38.7143	Induction of labour	Unchecked	Checked	Unchecked	Unchecked	Unchecked	Unchecked	Unchecked	Unchecked	Unchecked	Unchecked	Unchecked	Unchecked	Unchecked	Unchecked	2.62	Female	8.9	Yes
41	3	Current smoker	Yes				31.2	Yes	256	36.5714	No	No	277	39.5714	Spont labour	Checked	Unchecked	Unchecked	Unchecked	Unchecked	Unchecked	Unchecked	Unchecked	Unchecked	Checked	Unchecked	Unchecked	Unchecked	Unchecked	2.97	Female	9	Yes
37	0	Current smoker	Yes	4224	220.4	19.1652	28.3	Yes	251	35.8571	No	No	278	39.7143	Induction of labour	Unchecked	Checked	Unchecked	Unchecked	Unchecked	Unchecked	Unchecked	Unchecked	Unchecked	Unchecked	Unchecked	Unchecked	Unchecked	Unchecked	2.95	Female	9.2	Yes
35	2	Never	Yes	4781	1007	4.74777	20.5	Yes	246	35.1429	No	Yes	250	35.7143	Spont labour	Checked	Unchecked	Unchecked	Unchecked	Unchecked	Unchecked	Unchecked	Unchecked	Unchecked	Unchecked	Unchecked	Unchecked	Unchecked	Unchecked	2.28	Male	9.35	Yes
37	1	Never	Yes	2620	1099	2.38399	22.8	Yes	248	35.4286	No	No	270	38.5714	Induction of labour	Checked	Unchecked	Unchecked	Unchecked	Unchecked	Unchecked	Unchecked	Unchecked	Unchecked	Unchecked	Unchecked	Unchecked	Unchecked	Unchecked	2.66	Female	9.4	Yes
32	0	Never	Yes	4189	72.01	58.1725	22.6	Yes	255	36.4286	No	No	270	38.5714	Spont labour	Unchecked	Unchecked	Checked	Unchecked	Unchecked	Unchecked	Unchecked	Unchecked	Unchecked	Unchecked	Unchecked	Unchecked	Unchecked	Unchecked	2.57	Female	9.5	Yes
22	2	Current smoker	Yes	5165	120.1	43.0058	19.6	Yes	257	36.7143	No	No	291	41.5714	Induction of labour	Unchecked	Unchecked	Unchecked	Unchecked	Checked	Unchecked	Unchecked	Unchecked	Unchecked	Unchecked	Unchecked	Unchecked	Unchecked	Unchecked	3.14	Female	9.6	Yes
37	1	Never	Yes	2139	523.7	4.0844	21.5	Yes	257	36.7143	No	No	276	39.4286	Spont labour	Checked	Unchecked	Unchecked	Unchecked	Unchecked	Unchecked	Unchecked	Unchecked	Unchecked	Unchecked	Unchecked	Unchecked	Unchecked	Unchecked	3.09	Male	9.6	Yes
34	1	Never	Yes	1604	246.5	6.5071	24.6	Yes	253	36.1429	No	No	284	40.5714	Induction of labour	Checked	Unchecked	Unchecked	Unchecked	Unchecked	Unchecked	Unchecked	Unchecked	Unchecked	Unchecked	Unchecked	Unchecked	Unchecked	Unchecked	3.03	Female	9.6	Yes
27	0	Never	Yes	1872	131.4	14.2466	26	Yes	256	36.5714	No	No	290	41.4286	Induction of labour	Unchecked	Unchecked	Checked	Unchecked	Unchecked	Unchecked	Unchecked	Unchecked	Unchecked	Unchecked	Unchecked	Unchecked	Unchecked	Unchecked	3.26	Male	9.6	Yes
31	2	Never	Yes	3476	178	19.5281	28.6	Yes	252	36	No	No	272	38.8571	Spont labour	Unchecked	Unchecked	Unchecked	Unchecked	Unchecked	Unchecked	Checked	Unchecked	Unchecked	Unchecked	Unchecked	Unchecked	Unchecked	Unchecked	2.99	Male	9.7	Yes
28	0	Ex-smoker	Yes	1852	111.5	16.6099	26.8	Yes	255	36.4286	No	No	278	39.7143	Induction of labour	Checked	Unchecked	Unchecked	Unchecked	Unchecked	Unchecked	Unchecked	Unchecked	Unchecked	Unchecked	Unchecked	Unchecked	Unchecked	Unchecked	3.17	Male	9.7	Yes

## Sheet: Preeclamptics only (not SGA)
Age (years)	Parity	Smoking status	Informed Consent	sFlt-1	PlGF	sFlt1/PlGF	BMI at booking	Completed 36 week blood test	Gestation at 36/40 bloods days	Gestation at 36 FLAG blood test in weeks	Changed hypertension status since 28/40	Gestational Diabetes this pregnancy	Gestation at delivery in days	Gestation at delivery in weeks	Onset of delivery	Mode of Delivery (choice=NVD)	Mode of Delivery (choice=Instrumental for fetal distress)	Mode of Delivery (choice=Instrumental for FTP in S2)	Mode of Delivery (choice=Non-urgent C/S for failed IOL)	Mode of Delivery (choice=Em C/S for fetal distress)	Mode of Delivery (choice=Em C/S for dystocia)	Mode of Delivery (choice=Em C/S for planned C/S in labour or with SROM)	Mode of Delivery (choice=Elective C/S)	Mode of Delivery (choice=Instrumental delivery for maternal medical condition)	Complications (choice=Gestational Hypertension)	Complications (choice=Preeclampsia)	Complications (choice=HELLP)	Complications (choice=Eclampsia)	Complications (choice=Placental Abruption)	Birth Weight (kg)	Baby Gender	Birth weight centile	birth centile less than 10th
36	0	Never	Yes	4088	156.1	26.1883	26.8	Yes	252	36	No	No	287	41	Spont labour	Unchecked	Unchecked	Checked	Unchecked	Unchecked	Unchecked	Unchecked	Unchecked	Unchecked	Unchecked	Checked	Unchecked	Unchecked	Unchecked	3.94	Male	64.5	No
35	1	Never	Yes	4770	142.1	33.5679	24	Yes	253	36.1429	No	No	273	39	Spont labour	Unchecked	Unchecked	Unchecked	Unchecked	Unchecked	Unchecked	Checked	Unchecked	Unchecked	Unchecked	Checked	Unchecked	Unchecked	Unchecked	4.29	Male	98.5	No
30	1	Never	Yes	3227	164.5	19.617	31.4	Yes	254	36.2857	No	No	283	40.4286	Induction of labour	Checked	Unchecked	Unchecked	Unchecked	Unchecked	Unchecked	Unchecked	Unchecked	Unchecked	Unchecked	Checked	Unchecked	Unchecked	Unchecked	3.86	Female	51.4	No
34	1	Never	Yes	4188	105.4	39.7343	27	Yes	249	35.5714	No	No	275	39.2857	Spont labour	Checked	Unchecked	Unchecked	Unchecked	Unchecked	Unchecked	Unchecked	Unchecked	Unchecked	Unchecked	Checked	Unchecked	Unchecked	Unchecked	3.64	Male	46.4	No
32	0	Never	Yes	17502	105.8	165.425	21.2	Yes	259	37	Preeclampsia	No	261	37.2857	Induction of labour	Checked	Unchecked	Unchecked	Unchecked	Unchecked	Unchecked	Unchecked	Unchecked	Unchecked	Unchecked	Checked	Unchecked	Unchecked	Unchecked	2.66	Female	25.9	No
37	1	Never	Yes	6941	46.48	149.333	25.9	Yes	250	35.7143	No	No	275	39.2857	No labour	Unchecked	Unchecked	Unchecked	Unchecked	Unchecked	Checked	Unchecked	Unchecked	Unchecked	Unchecked	Checked	Unchecked	Unchecked	Unchecked	3.07	Female	18.1	No
34	1	Never	Yes	6368	85.12	74.812	23.9	Yes	258	36.8571	No	No	286	40.8571	Spont labour	Unchecked	Unchecked	Unchecked	Unchecked	Unchecked	Checked	Unchecked	Unchecked	Unchecked	Unchecked	Checked	Unchecked	Unchecked	Unchecked	3.35	Male	22.4	No
27	0	Never	Yes	4645	109.2	42.5366	34.3	Yes	253	36.1429	No	Yes	271	38.7143	Induction of labour	Checked	Unchecked	Unchecked	Unchecked	Unchecked	Unchecked	Unchecked	Unchecked	Unchecked	Unchecked	Checked	Unchecked	Unchecked	Unchecked	3.48	Female	69.5	No
24	1	Current smoker	Yes	1407	880.5	1.59796	27.4	Yes	246	35.1429	Gestational Hypertension	No	275	39.2857	Induction of labour	Checked	Unchecked	Unchecked	Unchecked	Unchecked	Unchecked	Unchecked	Unchecked	Unchecked	Unchecked	Checked	Unchecked	Unchecked	Unchecked	3.64	Male	47.1	No
36	1	Never	Yes	2275	864.5	2.63158	32.4	Yes	254	36.2857	No	No	293	41.8571	Induction of labour	Unchecked	Unchecked	Unchecked	Unchecked	Unchecked	Checked	Unchecked	Unchecked	Unchecked	Unchecked	Checked	Unchecked	Unchecked	Unchecked	4.54	Male	83.1	No
37	1	Never	Yes	5959	187.3	31.8153	37.7	Yes	257	36.7143	No	No	269	38.4286	No labour	Unchecked	Unchecked	Unchecked	Unchecked	Unchecked	Unchecked	Unchecked	Checked	Unchecked	Unchecked	Checked	Unchecked	Unchecked	Unchecked	5.06	Female	100	No
33	0	Never	Yes	4068	105.5	38.5592	22.5	Yes	256	36.5714	No	No	283	40.4286	Spont labour	Unchecked	Unchecked	Unchecked	Unchecked	Checked	Unchecked	Unchecked	Unchecked	Unchecked	Unchecked	Checked	Unchecked	Unchecked	Unchecked	3.39	Female	47.6	No
35	0	Never	Yes	5574	58.29	95.6253	25.2	Yes	258	36.8571	No	No	290	41.4286	Induction of labour	Unchecked	Unchecked	Checked	Unchecked	Unchecked	Unchecked	Unchecked	Unchecked	Unchecked	Unchecked	Checked	Unchecked	Unchecked	Unchecked	3.33	Female	29.8	No
32	1	Never	Yes	2594	238.9	10.8581	28.9	Yes	247	35.2857	No	Yes	286	40.8571	Induction of labour	Checked	Unchecked	Unchecked	Unchecked	Unchecked	Unchecked	Unchecked	Unchecked	Unchecked	Unchecked	Checked	Unchecked	Unchecked	Unchecked	3.86	Male	39.2	No
37	2	Never	Yes	3493	354.9	9.84221	30.5	Yes	246	35.1429	No	Yes	265	37.8571	No labour	Unchecked	Unchecked	Unchecked	Unchecked	Unchecked	Unchecked	Checked	Unchecked	Unchecked	Unchecked	Checked	Unchecked	Unchecked	Unchecked	4.12	Female	99.25	No
32	0	Never	Yes	6706	83.57	80.2441	23.1	Yes	250	35.7143	No	No	265	37.8571	No labour	Unchecked	Unchecked	Unchecked	Unchecked	Unchecked	Unchecked	Unchecked	Checked	Unchecked	Unchecked	Checked	Unchecked	Unchecked	Unchecked	2.91	Female	38.1	No
32	0	Never	Yes	3422	81.91	41.7776	20	Yes	248	35.4286	No	No	284	40.5714	Spont labour	Unchecked	Unchecked	Unchecked	Unchecked	Unchecked	Checked	Unchecked	Unchecked	Unchecked	Unchecked	Checked	Unchecked	Unchecked	Unchecked	3.24	Female	25.6	No
40	0	Never	Yes	2560	660.7	3.87468	20.8	Yes	252	36	No	No	276	39.4286	Spont labour	Unchecked	Unchecked	Unchecked	Unchecked	Unchecked	Checked	Unchecked	Unchecked	Unchecked	Unchecked	Checked	Unchecked	Unchecked	Unchecked	3.65	Male	81.9	No
28	0	Ex-smoker	Yes	4252	158.6	26.8096	26.4	Yes	255	36.4286	Preeclampsia	No	269	38.4286	Induction of labour	Unchecked	Unchecked	Unchecked	Checked	Unchecked	Unchecked	Unchecked	Unchecked	Unchecked	Unchecked	Checked	Unchecked	Unchecked	Unchecked	3.38	Female	72.7	No
38	0	Ex-smoker	Yes	8836	95.42	92.6011	20.7	Yes	249	35.5714	No	Yes	268	38.2857	Spont labour	Unchecked	Checked	Unchecked	Unchecked	Unchecked	Unchecked	Unchecked	Unchecked	Unchecked	Unchecked	Checked	Unchecked	Unchecked	Unchecked	3.63	Male	93.2	No
30	0	Never	Yes	7613	61.99	122.81	31.3	Yes	258	36.8571	Preeclampsia	No	260	37.1429	Induction of labour	Checked	Unchecked	Unchecked	Unchecked	Unchecked	Unchecked	Unchecked	Unchecked	Unchecked	Unchecked	Checked	Unchecked	Unchecked	Unchecked	3.08	Male	54.8	No
24	0	Never	Yes	4857	65.16	74.5396	25.6	Yes	253	36.1429	Gestational Hypertension	Yes	272	38.8571	Spont labour	Unchecked	Unchecked	Unchecked	Unchecked	Checked	Checked	Unchecked	Unchecked	Unchecked	Unchecked	Checked	Unchecked	Unchecked	Unchecked	3.49	Female	77.6	No
33	0	Ex-smoker	Yes	3984	99.73	39.9479	19.6	Yes	257	36.7143	No	Yes	282	40.2857	Induction of labour	Unchecked	Unchecked	Unchecked	Unchecked	Unchecked	Checked	Unchecked	Unchecked	Unchecked	Unchecked	Checked	Unchecked	Unchecked	Unchecked	3.06	Female	18.8	No
41	0	Current smoker	Yes	5024	235.7	21.3152	27	Yes	256	36.5714	No	No	279	39.8571	Spont labour	Unchecked	Checked	Checked	Unchecked	Unchecked	Unchecked	Unchecked	Unchecked	Unchecked	Unchecked	Checked	Unchecked	Unchecked	Unchecked	3.12	Female	29.1	No
44	0	Never	Yes	9739	35.85	271.66	28.4	Yes	254	36.2857	Preeclampsia	No	256	36.5714	No labour	Unchecked	Unchecked	Unchecked	Unchecked	Unchecked	Unchecked	Unchecked	Checked	Unchecked	Unchecked	Checked	Checked	Unchecked	Unchecked	2.69	Male	31.2	No
28	0	Never	Yes	2173	390.5	5.56466	25.4	Yes	255	36.4286	No	No	288	41.1429	Induction of labour	Checked	Unchecked	Unchecked	Unchecked	Unchecked	Unchecked	Unchecked	Unchecked	Unchecked	Unchecked	Checked	Unchecked	Unchecked	Unchecked	3.39	Male	12.3	No
35	0	Ex-smoker	Yes	3777	64.62	58.4494	33.7	Yes	253	36.1429	No	No	273	39	Induction of labour	Unchecked	Unchecked	Unchecked	Unchecked	Checked	Checked	Unchecked	Unchecked	Unchecked	Unchecked	Checked	Unchecked	Unchecked	Unchecked	3.86	Male	77.1	No
38	0	Ex-smoker	Yes	5396	96.57	55.8766	31.5	Yes	252	36	Gestational Hypertension	Yes	282	40.2857	Spont labour	Unchecked	Unchecked	Checked	Unchecked	Unchecked	Unchecked	Unchecked	Unchecked	Unchecked	Unchecked	Checked	Unchecked	Unchecked	Unchecked	3.9	Male	58.4	No
28	0	Ex-smoker	Yes	17953	156.8	114.496	29.4	Yes	251	35.8571	Preeclampsia	No	253	36.1429	Induction of labour	Checked	Unchecked	Unchecked	Unchecked	Unchecked	Unchecked	Unchecked	Unchecked	Unchecked	Unchecked	Checked	Unchecked	Unchecked	Unchecked	2.87	Male	49.2	No
35	0	Ex-smoker	Yes	6832	65.87	103.719	34.1	Yes	252	36	No	No	284	40.5714	Induction of labour	Unchecked	Checked	Unchecked	Unchecked	Unchecked	Unchecked	Unchecked	Unchecked	Unchecked	Unchecked	Checked	Unchecked	Unchecked	Unchecked	3.42	Female	19	No
29	0	Never	Yes	6006	110.7	54.2547	22.7	Yes	249	35.5714	No	No	290	41.4286	Induction of labour	Unchecked	Checked	Unchecked	Unchecked	Unchecked	Unchecked	Unchecked	Unchecked	Unchecked	Unchecked	Checked	Unchecked	Unchecked	Unchecked	2.87	Female	29.5	No
34	0	Never	Yes	8791	35.95	244.534	27.3	Yes	246	35.1429	No	No	260	37.1429	Spont labour	Checked	Unchecked	Unchecked	Unchecked	Unchecked	Unchecked	Unchecked	Unchecked	Unchecked	Unchecked	Checked	Unchecked	Unchecked	Unchecked	2.91	Male	27.8	No

## Sheet: 210 matched controls
Age (years)	Parity	Smoking status	Informed Consent	sFlt-1	PlGF	sFlt1/PlGF	BMI at booking	Completed 36 week blood test	Gestation at 36/40 bloods days	Gestation at 36 FLAG blood test in weeks	Changed hypertension status since 28/40	Gestational Diabetes this pregnancy	Gestation at delivery in days	Gestation at delivery in weeks	Onset of delivery	Mode of Delivery (choice=NVD)	Mode of Delivery (choice=Instrumental for fetal distress)	Mode of Delivery (choice=Instrumental for FTP in S2)	Mode of Delivery (choice=Non-urgent C/S for failed IOL)	Mode of Delivery (choice=Em C/S for fetal distress)	Mode of Delivery (choice=Em C/S for dystocia)	Mode of Delivery (choice=Em C/S for planned C/S in labour or with SROM)	Mode of Delivery (choice=Elective C/S)	Mode of Delivery (choice=Instrumental delivery for maternal medical condition)	Complications (choice=Gestational Hypertension)	Complications (choice=Preeclampsia)	Complications (choice=HELLP)	Complications (choice=Eclampsia)	Complications (choice=Placental Abruption)	Birth Weight (kg)	Baby Gender	Birth weight centile	birth centile less than 10th
31	0	Never	Yes	3770	874.4	4.31153	22.8	Yes	252	36	No	No	278	39.7143	Spont labour	Unchecked	Unchecked	Unchecked	Unchecked	Unchecked	Checked	Unchecked	Unchecked	Unchecked	Unchecked	Unchecked	Unchecked	Unchecked	Unchecked	3.68	Male	70.4	No
36	0	Never	Yes	2544	165.9	15.3345		Yes	257	36.7143	No	No	293	41.8571	Induction of labour	Unchecked	Unchecked	Unchecked	Unchecked	Checked	Checked	Unchecked	Unchecked	Unchecked	Unchecked	Unchecked	Unchecked	Unchecked	Unchecked	4.34	Male	75.6	No
29	0	Never	Yes	2834	791.4	3.581	21.9	Yes	258	36.8571	No	No	280	40	Spont labour	Checked	Unchecked	Unchecked	Unchecked	Unchecked	Unchecked	Unchecked	Unchecked	Unchecked	Unchecked	Unchecked	Unchecked	Unchecked	Unchecked	3.45	Female	48.8	No
26	0	Never	Yes	2540	325.2	7.81058	20.7	Yes	254	36.2857	No	No	266	38	Induction of labour	Unchecked	Checked	Checked	Unchecked	Unchecked	Unchecked	Unchecked	Unchecked	Unchecked	Unchecked	Unchecked	Unchecked	Unchecked	Unchecked	2.85	Male	23.9	No
40	0	Never	Yes	3957	253.8	15.591	28.4	Yes	251	35.8571	No	Yes	282	40.2857	Induction of labour	Unchecked	Unchecked	Unchecked	Checked	Unchecked	Unchecked	Unchecked	Unchecked	Unchecked	Unchecked	Unchecked	Unchecked	Unchecked	Unchecked	2.75	Female	55.9	No
30	0	Never	Yes	2889	412.7	7.00024	32.2	Yes	255	36.4286	No	Yes	277	39.5714	Induction of labour	Checked	Unchecked	Unchecked	Unchecked	Unchecked	Unchecked	Unchecked	Unchecked	Unchecked	Unchecked	Unchecked	Unchecked	Unchecked	Unchecked	4.19	Male	89.2	No
29	1	Ex-smoker	Yes	3074	64.46	47.6885	25	Yes	254	36.2857	No	No	263	37.5714	Induction of labour	Checked	Unchecked	Unchecked	Unchecked	Unchecked	Unchecked	Unchecked	Unchecked	Unchecked	Unchecked	Unchecked	Unchecked	Unchecked	Unchecked	2.69	Female	13.2	No
38	0	Never	Yes	1923	100.1	19.2108	35	Yes	254	36.2857	No	No	286	40.8571	Induction of labour	Unchecked	Checked	Checked	Unchecked	Unchecked	Unchecked	Unchecked	Unchecked	Unchecked	Unchecked	Unchecked	Unchecked	Unchecked	Unchecked	3.8	Female	44.2	No
34	0	Never	Yes	1388	431.5	3.21669	23.5	Yes	249	35.5714	No	No	271	38.7143	Induction of labour	Checked	Unchecked	Unchecked	Unchecked	Unchecked	Unchecked	Unchecked	Unchecked	Unchecked	Unchecked	Unchecked	Unchecked	Unchecked	Unchecked	3.17	Male	33.1	No
24	0	Current smoker	Yes	993.7	469.3	2.11741	41.6	Yes	254	36.2857	No	No	281	40.1429	Induction of labour	Checked	Unchecked	Unchecked	Unchecked	Unchecked	Unchecked	Unchecked	Unchecked	Unchecked	Unchecked	Unchecked	Unchecked	Unchecked	Unchecked	3.64	Male	35.1	No
34	0	Never	Yes	1103	719.8	1.53237	26.5	Yes	253	36.1429	No	Yes	266	38	Induction of labour	Checked	Unchecked	Unchecked	Unchecked	Unchecked	Unchecked	Unchecked	Unchecked	Unchecked	Unchecked	Unchecked	Unchecked	Unchecked	Unchecked	3.03	Female	52.5	No
38	0	Never	Yes	1861	357.2	5.20997	20.8	Yes	251	35.8571	No	No	276	39.4286	Induction of labour	Unchecked	Checked	Checked	Unchecked	Unchecked	Unchecked	Unchecked	Unchecked	Unchecked	Unchecked	Unchecked	Unchecked	Unchecked	Unchecked	3.12	Female	27.7	No
34	2	Never	Yes	2726	406.7	6.70273	33.8	Yes	258	36.8571	No	No	279	39.8571	Induction of labour	Checked	Unchecked	Unchecked	Unchecked	Unchecked	Unchecked	Unchecked	Unchecked	Unchecked	Unchecked	Unchecked	Unchecked	Unchecked	Unchecked	3.82	Female	56.3	No
26	1	Ex-smoker	Yes	2027	347.9	5.82639	28.3	Yes	255	36.4286	No	No	284	40.5714	Spont labour	Checked	Unchecked	Unchecked	Unchecked	Unchecked	Unchecked	Unchecked	Unchecked	Unchecked	Unchecked	Unchecked	Unchecked	Unchecked	Unchecked	4.66	Male	96.1	No
31	1	Never	Yes	1836	258.4	7.10526	24.1	Yes	259	37	No	No	273	39	Spont labour	Checked	Unchecked	Unchecked	Unchecked	Unchecked	Unchecked	Unchecked	Unchecked	Unchecked	Unchecked	Unchecked	Unchecked	Unchecked	Unchecked	3.2	Female	30.7	No
37	0	Never	Yes	1115	614.4	1.81478	19.9	Yes	257	36.7143	No	No	285	40.7143	Spont labour	Checked	Unchecked	Unchecked	Unchecked	Unchecked	Unchecked	Unchecked	Unchecked	Unchecked	Unchecked	Unchecked	Unchecked	Unchecked	Unchecked	3.63	Male	38	No
33	1	Ex-smoker	Yes	1403	1040	1.34904	32.2	Yes	255	36.4286	No	No	279	39.8571	Spont labour	Checked	Unchecked	Unchecked	Unchecked	Unchecked	Unchecked	Unchecked	Unchecked	Unchecked	Unchecked	Unchecked	Unchecked	Unchecked	Unchecked	4.51	Female	97.4	No
32	2	Never	Yes	3713	963.9	3.85206	21.5	Yes	252	36	No	No	280	40	Spont labour	Checked	Unchecked	Unchecked	Unchecked	Unchecked	Unchecked	Unchecked	Unchecked	Unchecked	Unchecked	Unchecked	Unchecked	Unchecked	Unchecked	3.42	Female	24.6	No
35	0	Never	Yes	3001	254.9	11.7732	19.1	Yes	259	37	No	No	264	37.7143	Induction of labour	Unchecked	Checked	Unchecked	Unchecked	Unchecked	Unchecked	Unchecked	Unchecked	Unchecked	Unchecked	Unchecked	Unchecked	Unchecked	Unchecked	2.77	Female	31.1	No
36	2	Current smoker	Yes	1504	1896	0.793249	34.2	Yes	254	36.2857	No	Yes	283	40.4286	Induction of labour	Unchecked	Unchecked	Unchecked	Checked	Unchecked	Unchecked	Unchecked	Unchecked	Unchecked	Unchecked	Unchecked	Unchecked	Unchecked	Unchecked	3.57	Female	45.9	No
34	1	Never	Yes	1150	573.4	2.00558	24.4	Yes	259	37	No	No	285	40.7143	Spont labour	Checked	Unchecked	Unchecked	Unchecked	Unchecked	Unchecked	Unchecked	Unchecked	Unchecked	Unchecked	Unchecked	Unchecked	Unchecked	Unchecked	4.7	Male	97.3	No
26	3	Current smoker	Yes	2059	776.8	2.65062	21.1	Yes	253	36.1429	No	No	274	39.1429	No labour	Unchecked	Unchecked	Unchecked	Unchecked	Unchecked	Unchecked	Unchecked	Checked	Unchecked	Unchecked	Unchecked	Unchecked	Unchecked	Unchecked	3.8	Male	66.8	No
34	1	Never	Yes	2301	916.8	2.50982	19.2	Yes	248	35.4286	No	No	283	40.4286	Spont labour	Checked	Unchecked	Unchecked	Unchecked	Unchecked	Unchecked	Unchecked	Unchecked	Unchecked	Unchecked	Unchecked	Unchecked	Unchecked	Unchecked	3.93	Male	73.15	No
32	1	Ex-smoker	Yes	3799	117.7	32.277	19.8	Yes	253	36.1429	No	No	279	39.8571	Spont labour	Checked	Unchecked	Unchecked	Unchecked	Unchecked	Unchecked	Unchecked	Unchecked	Unchecked	Unchecked	Unchecked	Unchecked	Unchecked	Unchecked	3.76	Male	63.8	No
35	1	Ex-smoker	Yes	2129	750.5	2.83678	20.7	Yes	252	36	No	No	273	39	Spont labour	Checked	Unchecked	Unchecked	Unchecked	Unchecked	Unchecked	Unchecked	Unchecked	Unchecked	Unchecked	Unchecked	Unchecked	Unchecked	Unchecked	3.76	Male	75.8	No
34	1	Never	Yes	2018	292.8	6.89208	25.2	Yes	251	35.8571	No	No	286	40.8571	Spont labour	Checked	Unchecked	Unchecked	Unchecked	Unchecked	Unchecked	Unchecked	Unchecked	Unchecked	Unchecked	Unchecked	Unchecked	Unchecked	Unchecked	3.91	Female	62.3	No
38	0	Ex-smoker	Yes	3580	147.6	24.2547	33.5	Yes	250	35.7143	No	No	279	39.8571	Induction of labour	Unchecked	Unchecked	Unchecked	Unchecked	Checked	Checked	Unchecked	Unchecked	Unchecked	Unchecked	Unchecked	Unchecked	Unchecked	Unchecked	3.67	Female	61.2	No
41	1	Never	Yes	4535	163.1	27.805	27.2	Yes	251	35.8571	No	No	280	40	Induction of labour	Unchecked	Checked	Unchecked	Unchecked	Unchecked	Unchecked	Unchecked	Unchecked	Unchecked	Unchecked	Unchecked	Unchecked	Unchecked	Unchecked	3.84	Male	59.3	No
24	0	Current smoker	Yes	3928	252.3	15.5688	27.4	Yes	256	36.5714	No	No	284	40.5714	Induction of labour	Unchecked	Unchecked	Unchecked	Unchecked	Unchecked	Checked	Unchecked	Unchecked	Unchecked	Checked	Unchecked	Unchecked	Unchecked	Unchecked	3.93	Male	74.8	No
36	0	Never	Yes	1866	167.4	11.147	26.3	Yes	250	35.7143	No	Yes	282	40.2857	Induction of labour	Checked	Unchecked	Unchecked	Unchecked	Unchecked	Unchecked	Unchecked	Unchecked	Unchecked	Unchecked	Unchecked	Unchecked	Unchecked	Unchecked	3.87	Male	73.5	No
29	0	Never	Yes	1909	562.2	3.39559	22.9	Yes	251	35.8571	No	Yes	283	40.4286	Induction of labour	Unchecked	Checked	Checked	Unchecked	Unchecked	Unchecked	Unchecked	Unchecked	Unchecked	Unchecked	Unchecked	Unchecked	Unchecked	Unchecked	3.45	Female	61.5	No
20	1	Current smoker	Yes	1726	747.7	2.30841	23.3	Yes	247	35.2857	No	No	290	41.4286	Induction of labour	Checked	Unchecked	Unchecked	Unchecked	Unchecked	Unchecked	Unchecked	Unchecked	Unchecked	Checked	Unchecked	Unchecked	Unchecked	Unchecked	3.7	Male	29.5	No
30	2	Never	Yes	3208	805.5	3.98262	19.7	Yes	257	36.7143	No	No	286	40.8571	Spont labour	Checked	Unchecked	Unchecked	Unchecked	Unchecked	Unchecked	Unchecked	Unchecked	Unchecked	Unchecked	Unchecked	Unchecked	Unchecked	Unchecked	3.93	Female	76.9	No
29	0	Never	Yes	5248	57.35	91.5083	20.3	Yes	253	36.1429	No	No	275	39.2857	Induction of labour	Checked	Unchecked	Unchecked	Unchecked	Unchecked	Unchecked	Unchecked	Unchecked	Unchecked	Unchecked	Unchecked	Unchecked	Unchecked	Unchecked	3.21	Male	39.9	No
26	0	Never	Yes	3616	131.9	27.4147	22.9	Yes	254	36.2857	No	No	291	41.5714	Induction of labour	Checked	Unchecked	Unchecked	Unchecked	Unchecked	Unchecked	Unchecked	Unchecked	Unchecked	Checked	Unchecked	Unchecked	Unchecked	Unchecked	3.81	Male	46.9	No
31	1	Ex-smoker	Yes	2991	307	9.74267	21.2	Yes	251	35.8571	No	No	288	41.1429	No labour	Unchecked	Unchecked	Unchecked	Unchecked	Unchecked	Unchecked	Unchecked	Checked	Unchecked	Unchecked	Unchecked	Unchecked	Unchecked	Unchecked	3.99	Female	71.5	No
31	0	Never	Yes	4185	116.9	35.7998	25	Yes	251	35.8571	No	No	275	39.2857	Induction of labour	Checked	Unchecked	Unchecked	Unchecked	Unchecked	Unchecked	Unchecked	Unchecked	Unchecked	Unchecked	Unchecked	Unchecked	Unchecked	Unchecked	2.95	Female	20.8	No
33	2	Ex-smoker	Yes	1601	514.2	3.11357	22.4	Yes	252	36	No	No	275	39.2857	Induction of labour	Checked	Unchecked	Unchecked	Unchecked	Unchecked	Unchecked	Unchecked	Unchecked	Unchecked	Unchecked	Unchecked	Unchecked	Unchecked	Unchecked	3.54	Male	46.2	No
38	1	Ex-smoker	Yes	1667	693.4	2.4041	27.4	Yes	252	36	No	No	286	40.8571	Spont labour	Checked	Unchecked	Unchecked	Unchecked	Unchecked	Unchecked	Unchecked	Unchecked	Unchecked	Unchecked	Unchecked	Unchecked	Unchecked	Unchecked	3.45	Male	11.6	No
34	2	Ex-smoker	Yes	3080	492	6.26016	21.7	Yes	253	36.1429	No	No	275	39.2857	Spont labour	Checked	Unchecked	Unchecked	Unchecked	Unchecked	Unchecked	Unchecked	Unchecked	Unchecked	Unchecked	Unchecked	Unchecked	Unchecked	Unchecked	3.48	Female	50.8	No
32	0	Never	Yes	6479	150.5	43.0498	23.1	Yes	253	36.1429	No	No	267	38.1429	Spont labour	Unchecked	Unchecked	Unchecked	Unchecked	Unchecked	Checked	Unchecked	Unchecked	Unchecked	Unchecked	Unchecked	Unchecked	Unchecked	Unchecked	3.3	Female	62.9	No
26	0	Current smoker	Yes	1602	158.5	10.1073	26.1	Yes	259	37	No	No	283	40.4286	Spont labour	Unchecked	Checked	Unchecked	Unchecked	Unchecked	Unchecked	Unchecked	Unchecked	Unchecked	Checked	Unchecked	Unchecked	Unchecked	Unchecked	3.56	Female	38.3	No
30	0	Never	Yes	4393	126.6	34.6998	20.9	Yes	253	36.1429	No	No	276	39.4286	Spont labour	Unchecked	Unchecked	Checked	Unchecked	Unchecked	Unchecked	Unchecked	Unchecked	Unchecked	Unchecked	Unchecked	Unchecked	Unchecked	Unchecked	3.47	Female	65.5	No
31	0	Current smoker	Yes	2766	238.7	11.5878	27.2	Yes	250	35.7143	No	No	294	42	Induction of labour	Unchecked	Unchecked	Unchecked	Unchecked	Unchecked	Checked	Unchecked	Unchecked	Unchecked	Unchecked	Unchecked	Unchecked	Unchecked	Unchecked	3.31	Female	23.1	No
40	3	Never	Yes	2490	98.95	25.1642	33.3	Yes	258	36.8571	No	Yes	265	37.8571	Spont labour	Checked	Unchecked	Unchecked	Unchecked	Unchecked	Unchecked	Unchecked	Unchecked	Unchecked	Unchecked	Unchecked	Unchecked	Unchecked	Unchecked	2.85	Female	22.3	No
31	1	Ex-smoker	Yes	1636	473.6	3.45439	22.3	Yes	253	36.1429	No	No	277	39.5714	Spont labour	Unchecked	Unchecked	Unchecked	Unchecked	Checked	Unchecked	Unchecked	Unchecked	Unchecked	Unchecked	Unchecked	Unchecked	Unchecked	Unchecked	3.58	Female	79.8	No
40	0	Never	Yes	3029	215.1	14.0818	22.5	Yes	248	35.4286	No	No	285	40.7143	Spont labour	Checked	Unchecked	Unchecked	Unchecked	Unchecked	Unchecked	Unchecked	Unchecked	Unchecked	Unchecked	Unchecked	Unchecked	Unchecked	Unchecked	3.8	Male	56.9	No
46	5	Never	Yes	2840	188	15.1064	29.3	Yes	251	35.8571	No	Yes	268	38.2857	No labour	Unchecked	Unchecked	Unchecked	Unchecked	Unchecked	Unchecked	Unchecked	Checked	Unchecked	Unchecked	Unchecked	Unchecked	Unchecked	Unchecked	3.58	Female	83.2	No
43	1	Ex-smoker	Yes	3486	228.4	15.2627	30.5	Yes	257	36.7143	No	No	285	40.7143	No labour	Unchecked	Unchecked	Unchecked	Unchecked	Unchecked	Unchecked	Unchecked	Checked	Unchecked	Unchecked	Unchecked	Unchecked	Unchecked	Unchecked	3.8	Male	42.8	No
36	1	Never	Yes	887.1	918	0.96634	21.6	Yes	251	35.8571	No	No	286	40.8571	Induction of labour	Checked	Unchecked	Unchecked	Unchecked	Unchecked	Unchecked	Unchecked	Unchecked	Unchecked	Unchecked	Unchecked	Unchecked	Unchecked	Unchecked	3.58	Male	41.9	No
35	1	Ex-smoker	Yes	2270	566.9	4.00423	31.5	Yes	254	36.2857	No	No	280	40	Spont labour	Unchecked	Unchecked	Unchecked	Unchecked	Unchecked	Unchecked	Checked	Unchecked	Unchecked	Unchecked	Unchecked	Unchecked	Unchecked	Unchecked	3.91	Female	66.8	No
31	0	Never	Yes	1927	914.6	2.10693	23.3	Yes	257	36.7143	No	No	293	41.8571	Induction of labour	Unchecked	Checked	Checked	Unchecked	Unchecked	Unchecked	Unchecked	Unchecked	Unchecked	Unchecked	Unchecked	Unchecked	Unchecked	Unchecked	3.62	Male	25.9	No
35	1	Never	Yes	Insufficient due to instrument error	94.4	#VALUE!	26.5	Yes	248	35.4286	No	Yes	274	39.1429	Induction of labour	Checked	Unchecked	Unchecked	Unchecked	Unchecked	Unchecked	Unchecked	Unchecked	Unchecked	Unchecked	Unchecked	Unchecked	Unchecked	Unchecked	3.33	Male	28.1	No
30	0	Current smoker	Yes	Insufficient due to instrument error	775.1	#VALUE!	21.6	Yes	252	36	No	No	292	41.7143	Induction of labour	Unchecked	Unchecked	Unchecked	Unchecked	Checked	Unchecked	Unchecked	Unchecked	Unchecked	Unchecked	Unchecked	Unchecked	Unchecked	Unchecked	3.98	Male	62	No
33	0	Ex-smoker	Yes	Insufficient due to instrument error	431	#VALUE!	28.5	Yes	256	36.5714	No	No	291	41.5714	Induction of labour	Unchecked	Unchecked	Checked	Unchecked	Unchecked	Unchecked	Unchecked	Unchecked	Unchecked	Unchecked	Unchecked	Unchecked	Unchecked	Unchecked	3.57	Male	24.2	No
32	1	Never	Yes	1472	378.7	3.88698	21.5	Yes	252	36	No	No	286	40.8571	Spont labour	Checked	Unchecked	Unchecked	Unchecked	Unchecked	Unchecked	Unchecked	Unchecked	Unchecked	Unchecked	Unchecked	Unchecked	Unchecked	Unchecked	4.09	Female	82.8	No
31	1	Ex-smoker	Yes	1761	328.2	5.36563	32.3	Yes	255	36.4286	No	No	271	38.7143	Induction of labour	Checked	Unchecked	Unchecked	Unchecked	Unchecked	Unchecked	Unchecked	Unchecked	Unchecked	Unchecked	Unchecked	Unchecked	Unchecked	Unchecked	3.02	Female	14.2	No
38	2	Never	Yes	2446	514.9	4.75044	28.7	Yes	256	36.5714	No	No	267	38.1429	Induction of labour	Checked	Unchecked	Unchecked	Unchecked	Unchecked	Unchecked	Unchecked	Unchecked	Unchecked	Unchecked	Unchecked	Unchecked	Unchecked	Unchecked	3.84	Male	85.4	No
36	2	Never	Yes	2176	830.4	2.62042	23.2	Yes	246	35.1429	No	Yes	271	38.7143	Induction of labour	Checked	Unchecked	Unchecked	Unchecked	Unchecked	Unchecked	Unchecked	Unchecked	Unchecked	Checked	Unchecked	Unchecked	Unchecked	Unchecked	3.08	Female	32.2	No
34	1	Never	Yes	2716	569.9	4.76575	26.6	Yes	255	36.4286	No	No	282	40.2857	Spont labour	Checked	Unchecked	Unchecked	Unchecked	Unchecked	Unchecked	Unchecked	Unchecked	Unchecked	Unchecked	Unchecked	Unchecked	Unchecked	Unchecked	3.56	Male	24.8	No
40	2	Never	Yes	1830	309	5.92233	20.3	Yes	257	36.7143	No	Yes	278	39.7143	Induction of labour	Checked	Unchecked	Unchecked	Unchecked	Unchecked	Unchecked	Unchecked	Unchecked	Unchecked	Unchecked	Unchecked	Unchecked	Unchecked	Unchecked	3.8	Female	81.4	No
35	1	Never	Yes	834.9	807.5	1.03393	26.8	Yes	245	35	No	No	275	39.2857	Spont labour	Checked	Unchecked	Unchecked	Unchecked	Unchecked	Unchecked	Unchecked	Unchecked	Unchecked	Unchecked	Unchecked	Unchecked	Unchecked	Unchecked	3.32	Female	35.7	No
32	1	Never	Yes	2234	524	4.26336	30.5	Yes	257	36.7143	No	No	272	38.8571	Induction of labour	Checked	Unchecked	Unchecked	Unchecked	Unchecked	Unchecked	Unchecked	Unchecked	Unchecked	Unchecked	Unchecked	Unchecked	Unchecked	Unchecked	3.49	Female	39.1	No
43	2	Ex-smoker	Yes	3209	918.3	3.4945	36.8	Yes	252	36	No	No	273	39	Spont labour	Checked	Unchecked	Unchecked	Unchecked	Unchecked	Unchecked	Unchecked	Unchecked	Unchecked	Unchecked	Unchecked	Unchecked	Unchecked	Unchecked	3.98	Female	90.2	No
34	1	Never	Yes	1305	347	3.76081	25.3	Yes	255	36.4286	No	No	285	40.7143	Spont labour	Checked	Unchecked	Unchecked	Unchecked	Unchecked	Unchecked	Unchecked	Unchecked	Unchecked	Unchecked	Unchecked	Unchecked	Unchecked	Unchecked	4.32	Male	69.8	No
41	4	Current smoker	Yes	2172	286.3	7.58645	34	Yes	245	35	No	Yes	261	37.2857	Spont labour	Checked	Unchecked	Unchecked	Unchecked	Unchecked	Unchecked	Unchecked	Unchecked	Unchecked	Checked	Unchecked	Unchecked	Unchecked	Unchecked	3.39	Female	82.8	No
26	2	Current smoker	Yes	4226	185.1	22.8309	29.3	Yes	255	36.4286	No	No	259	37	Spont labour	Checked	Unchecked	Unchecked	Unchecked	Unchecked	Unchecked	Unchecked	Unchecked	Unchecked	Unchecked	Unchecked	Unchecked	Unchecked	Unchecked	2.9	Male	26.7	No
33	1	Never	Yes	1442	779.3	1.85038	31.4	Yes	258	36.8571	No	Yes	270	38.5714	Induction of labour	Checked	Unchecked	Unchecked	Unchecked	Unchecked	Unchecked	Unchecked	Unchecked	Unchecked	Checked	Unchecked	Unchecked	Unchecked	Unchecked	3.36	Male	39.5	No
39	3	Never	Yes	1702	514.5	3.30807	25	Yes	249	35.5714	No	No	280	40	Spont labour	Checked	Unchecked	Unchecked	Unchecked	Unchecked	Unchecked	Unchecked	Unchecked	Unchecked	Unchecked	Unchecked	Unchecked	Unchecked	Unchecked	3.66	Male	46.4	No
37	1	Current smoker	Yes	1748	220.6	7.92384	24.2	Yes	256	36.5714	No	No	279	39.8571	Induction of labour	Checked	Unchecked	Unchecked	Unchecked	Unchecked	Unchecked	Unchecked	Unchecked	Unchecked	Unchecked	Unchecked	Unchecked	Unchecked	Unchecked	3.12	Female	14.9	No
32	1	Never	Yes	3013	144.1	20.9091	28.2	Yes	256	36.5714	No	Yes	282	40.2857	Induction of labour	Checked	Unchecked	Unchecked	Unchecked	Unchecked	Unchecked	Unchecked	Unchecked	Unchecked	Checked	Unchecked	Unchecked	Unchecked	Unchecked	2.82	Female	11.2	No
34	1	Never	Yes	1403	669.4	2.09591	29.4	Yes	253	36.1429	No	Yes	271	38.7143	No labour	Unchecked	Unchecked	Unchecked	Unchecked	Unchecked	Unchecked	Checked	Unchecked	Unchecked	Unchecked	Unchecked	Unchecked	Unchecked	Unchecked	3.5	Female	60.2	No
35	1	Ex-smoker	Yes	1848	245	7.54286	22.4	Yes	256	36.5714	No	Yes	265	37.8571	Induction of labour	Checked	Unchecked	Unchecked	Unchecked	Unchecked	Unchecked	Unchecked	Unchecked	Unchecked	Unchecked	Unchecked	Unchecked	Unchecked	Unchecked	2.79	Male	16.5	No
35	0	Never	Yes	3702	945.9	3.91373	27.3	Yes	248	35.4286	No	Yes	270	38.5714	Induction of labour	Unchecked	Unchecked	Unchecked	Unchecked	Unchecked	Checked	Unchecked	Unchecked	Unchecked	Unchecked	Unchecked	Unchecked	Unchecked	Unchecked	3.06	Male	33.4	No
27	1	Never	Yes	6068	162.9	37.2498	28.1	Yes	255	36.4286	No	No	265	37.8571	Induction of labour	Checked	Unchecked	Unchecked	Unchecked	Unchecked	Unchecked	Unchecked	Unchecked	Unchecked	Unchecked	Unchecked	Unchecked	Unchecked	Unchecked	4.72	Male	100	No
36	1	Ex-smoker	Yes	3548	223.7	15.8605	22.6	Yes	253	36.1429	No	No	273	39	No labour	Unchecked	Unchecked	Unchecked	Unchecked	Unchecked	Unchecked	Unchecked	Checked	Unchecked	Unchecked	Unchecked	Unchecked	Unchecked	Unchecked	3.26	Male	23.7	No
31	1	Never	Yes	1302	2379	0.547289	23.7	Yes	256	36.5714	No	No	274	39.1429	No labour	Unchecked	Unchecked	Unchecked	Unchecked	Unchecked	Unchecked	Unchecked	Checked	Unchecked	Unchecked	Unchecked	Unchecked	Unchecked	Unchecked	3.19	Male	23.6	No
30	0	Ex-smoker	Yes	2069	620.9	3.33226	24.5	Yes	255	36.4286	No	No	275	39.2857	Induction of labour	Unchecked	Checked	Checked	Unchecked	Unchecked	Unchecked	Unchecked	Unchecked	Unchecked	Unchecked	Unchecked	Unchecked	Unchecked	Unchecked	3.39	Male	48.4	No
27	0	Never	Yes	4570	303.6	15.0527	27.5	Yes	245	35	No	No	280	40	Spont labour	Unchecked	Checked	Unchecked	Unchecked	Unchecked	Unchecked	Unchecked	Unchecked	Unchecked	Unchecked	Unchecked	Unchecked	Unchecked	Unchecked	3.47	Male	33.4	No
30	0	Never	Yes	3261	5274	0.618316	21.5	Yes	253	36.1429	No	No	276	39.4286	No labour	Unchecked	Unchecked	Unchecked	Unchecked	Unchecked	Unchecked	Unchecked	Checked	Unchecked	Unchecked	Unchecked	Unchecked	Unchecked	Unchecked	4.12	Male	96.9	No
31	1	Ex-smoker	Yes	2575	314.9	8.1772	24.9	Yes	256	36.5714	No	No	290	41.4286	Spont labour	Unchecked	Unchecked	Unchecked	Unchecked	Unchecked	Checked	Unchecked	Unchecked	Unchecked	Unchecked	Unchecked	Unchecked	Unchecked	Unchecked	4.29	Female	91.8	No
36	2	Never	Yes	1795	1221	1.47011	22.8	Yes	251	35.8571	No	No	280	40	Spont labour	Checked	Unchecked	Unchecked	Unchecked	Unchecked	Unchecked	Unchecked	Unchecked	Unchecked	Unchecked	Unchecked	Unchecked	Unchecked	Unchecked	3.75	Male	65.5	No
30	0	Never	Yes	2401	120.9	19.8594	26.8	Yes	252	36	No	Yes	278	39.7143	Spont labour	Unchecked	Checked	Checked	Unchecked	Unchecked	Unchecked	Unchecked	Unchecked	Unchecked	Unchecked	Unchecked	Unchecked	Unchecked	Unchecked	3.1	Female	13.6	No
35	1	Ex-smoker	Yes	3467	129.3	26.8136	28.8	Yes	249	35.5714	No	No	269	38.4286	No labour	Unchecked	Unchecked	Unchecked	Unchecked	Unchecked	Unchecked	Unchecked	Checked	Unchecked	Checked	Unchecked	Unchecked	Unchecked	Unchecked	3.44	Female	74.2	No
34	1	Never	Yes	3450	47.49	72.6469	23.7	Yes	248	35.4286	No	No	270	38.5714	Spont labour	Checked	Unchecked	Unchecked	Unchecked	Unchecked	Unchecked	Unchecked	Unchecked	Unchecked	Unchecked	Unchecked	Unchecked	Unchecked	Unchecked	3.55	Female	75.5	No
42	1	Ex-smoker	Yes	2136	80.53	26.5243	26.1	Yes	250	35.7143	No	No	277	39.5714	No labour	Unchecked	Unchecked	Unchecked	Unchecked	Unchecked	Unchecked	Checked	Unchecked	Unchecked	Unchecked	Unchecked	Unchecked	Unchecked	Unchecked	3.3	Male	20	No
33	1	Never	Yes	3046	744.9	4.08914	22	Yes	255	36.4286	No	No	292	41.7143	Induction of labour	Checked	Unchecked	Unchecked	Unchecked	Unchecked	Unchecked	Unchecked	Unchecked	Unchecked	Unchecked	Unchecked	Unchecked	Unchecked	Unchecked	4	Female	55.3	No
34	0	Never	Yes	2171	700.3	3.1001	22.3	Yes	252	36	No	No	282	40.2857	Induction of labour	Unchecked	Checked	Unchecked	Unchecked	Unchecked	Unchecked	Unchecked	Unchecked	Unchecked	Unchecked	Unchecked	Unchecked	Unchecked	Unchecked	3.58	Male	53.3	No
33	1	Never	Yes	3327	135.6	24.5354	28.3	Yes	249	35.5714	No	Yes	269	38.4286	No labour	Unchecked	Unchecked	Unchecked	Unchecked	Unchecked	Unchecked	Unchecked	Checked	Unchecked	Unchecked	Unchecked	Unchecked	Unchecked	Unchecked	3.12	Male	19.8	No
32	0	Ex-smoker	Yes	4371	133.5	32.7416	23.7	Yes	256	36.5714	No	No	278	39.7143	Spont labour	Checked	Unchecked	Unchecked	Unchecked	Unchecked	Unchecked	Unchecked	Unchecked	Unchecked	Unchecked	Unchecked	Unchecked	Unchecked	Unchecked	3.14	Female	30.8	No
32	0	Never	Yes	2189	256.4	8.53744	21.5	Yes	255	36.4286	No	No	289	41.2857	Induction of labour	Unchecked	Checked	Checked	Unchecked	Unchecked	Unchecked	Unchecked	Unchecked	Unchecked	Unchecked	Unchecked	Unchecked	Unchecked	Unchecked	3.43	Female	30.2	No
31	0	Never	Yes	1506	505.4	2.97982	22.5	Yes	256	36.5714	No	No	279	39.8571	Spont labour	Checked	Unchecked	Unchecked	Unchecked	Unchecked	Unchecked	Unchecked	Unchecked	Unchecked	Unchecked	Unchecked	Unchecked	Unchecked	Unchecked	3.57	Female	61.5	No
31	1	Ex-smoker	Yes	1153	261.6	4.40749	25.6	Yes	255	36.4286	No	No	286	40.8571	Spont labour	Checked	Unchecked	Unchecked	Unchecked	Unchecked	Unchecked	Unchecked	Unchecked	Unchecked	Unchecked	Unchecked	Unchecked	Unchecked	Unchecked	3.95	Female	53	No
39	1	Ex-smoker	Yes	4152	320.6	12.9507	29.1	Yes	249	35.5714	No	No	275	39.2857	No labour	Unchecked	Unchecked	Unchecked	Unchecked	Unchecked	Unchecked	Unchecked	Checked	Unchecked	Unchecked	Unchecked	Unchecked	Unchecked	Unchecked	4.84	Male	99.5	No
33	1	Never	Yes	939.5	1143	0.82196	26.6	Yes	250	35.7143	No	No	280	40	Spont labour	Checked	Unchecked	Unchecked	Unchecked	Unchecked	Unchecked	Unchecked	Unchecked	Unchecked	Unchecked	Unchecked	Unchecked	Unchecked	Unchecked	3.64	Female	49.6	No
36	1	Current smoker	Yes	1325	266.2	4.97746	25.8	Yes	245	35	No	No	266	38	Spont labour	Checked	Unchecked	Unchecked	Unchecked	Unchecked	Unchecked	Unchecked	Unchecked	Unchecked	Unchecked	Unchecked	Unchecked	Unchecked	Unchecked	3.22	Male	35.5	No
27	1	Ex-smoker	Yes	1973	904.5	2.18132	37.3	Yes	257	36.7143	No	No	270	38.5714	No labour	Unchecked	Unchecked	Unchecked	Unchecked	Unchecked	Unchecked	Unchecked	Checked	Unchecked	Unchecked	Unchecked	Unchecked	Unchecked	Unchecked	3.73	Male	73.3	No
32	2	Ex-smoker	Yes	2868	944	3.03814	23.7	Yes	252	36	No	No	283	40.4286	Induction of labour	Checked	Unchecked	Unchecked	Unchecked	Unchecked	Unchecked	Unchecked	Unchecked	Unchecked	Unchecked	Unchecked	Unchecked	Unchecked	Unchecked	3.51	Female	33.9	No
36	1	Never	Yes	3189	237.4	13.433	31.6	Yes	255	36.4286	No	No	282	40.2857	Spont labour	Checked	Unchecked	Unchecked	Unchecked	Unchecked	Unchecked	Unchecked	Unchecked	Unchecked	Unchecked	Unchecked	Unchecked	Unchecked	Unchecked	3.35	Female	28.3	No
38	1	Never	Yes	3629	267.8	13.5512	26	Yes	249	35.5714	No	Yes	263	37.5714	Induction of labour	Checked	Unchecked	Unchecked	Unchecked	Unchecked	Unchecked	Unchecked	Unchecked	Unchecked	Unchecked	Unchecked	Unchecked	Unchecked	Unchecked	3.49	Male	71.3	No
31	1	Never	Yes	1689	2358	0.716285	21.2	Yes	254	36.2857	No	No	282	40.2857	Spont labour	Checked	Unchecked	Unchecked	Unchecked	Unchecked	Unchecked	Unchecked	Unchecked	Unchecked	Unchecked	Unchecked	Unchecked	Unchecked	Unchecked	3.7	Female	53	No
36	1	Ex-smoker	Yes	1515	217.1	6.97835	28	Yes	253	36.1429	No	No	279	39.8571	Spont labour	Checked	Unchecked	Unchecked	Unchecked	Unchecked	Unchecked	Unchecked	Unchecked	Unchecked	Unchecked	Unchecked	Unchecked	Unchecked	Unchecked	3.67	Female	51.2	No
32	1	Never	Yes	3507	163.4	21.4627	26.8	Yes	256	36.5714	No	No	280	40	Spont labour	Unchecked	Unchecked	Checked	Unchecked	Unchecked	Unchecked	Unchecked	Unchecked	Unchecked	Unchecked	Unchecked	Unchecked	Unchecked	Unchecked	4.33	Male	85.7	No
33	0	Never	Yes	3503	316.6	11.0644	20.2	Yes	251	35.8571	No	No	291	41.5714	Spont labour	Unchecked	Checked	Unchecked	Unchecked	Unchecked	Unchecked	Unchecked	Unchecked	Unchecked	Unchecked	Unchecked	Unchecked	Unchecked	Unchecked	3.29	Male	13	No
26	1	Current smoker	Yes	2195	918.4	2.39003	36.5	Yes	251	35.8571	No	Yes	272	38.8571	Induction of labour	Checked	Unchecked	Unchecked	Unchecked	Unchecked	Unchecked	Unchecked	Unchecked	Unchecked	Unchecked	Unchecked	Unchecked	Unchecked	Unchecked	3.3	Female	32.4	No
32	0	Never	Yes	1923	723.3	2.65865	20.4	Yes	251	35.8571	No	No	253	36.1429	Induction of labour	Unchecked	Checked	Unchecked	Unchecked	Unchecked	Unchecked	Unchecked	Unchecked	Unchecked	Unchecked	Unchecked	Unchecked	Unchecked	Unchecked	2.62	Male	32.55	No
34	1	Never	Yes	1509	541.1	2.78876	33.3	Yes	253	36.1429	No	No	288	41.1429	Spont labour	Unchecked	Unchecked	Unchecked	Unchecked	Unchecked	Checked	Unchecked	Unchecked	Unchecked	Unchecked	Unchecked	Unchecked	Unchecked	Unchecked	3.63	Female	45.55	No
35	2	Never	Yes	2021	472.6	4.27634	32.4	Yes	253	36.1429	No	Yes	272	38.8571	Induction of labour	Checked	Unchecked	Unchecked	Unchecked	Unchecked	Unchecked	Unchecked	Unchecked	Unchecked	Unchecked	Unchecked	Unchecked	Unchecked	Unchecked	3.53	Male	47.5	No
36	1	Never	Yes	3997	782.5	5.10799	27.3	Yes	256	36.5714	No	No	269	38.4286	Spont labour	Unchecked	Unchecked	Unchecked	Unchecked	Unchecked	Unchecked	Checked	Unchecked	Unchecked	Unchecked	Unchecked	Unchecked	Unchecked	Unchecked	4.01	Male	90	No
33	1	Never	Yes	2541	227.4	11.1741	25.5	Yes	247	35.2857	No	Yes	280	40	Spont labour	Unchecked	Unchecked	Unchecked	Unchecked	Unchecked	Checked	Unchecked	Unchecked	Unchecked	Unchecked	Unchecked	Unchecked	Unchecked	Unchecked	3.41	Female	45.3	No
26	0	Never	Yes	2206	238.6	9.2456	28.6	Yes	250	35.7143	No	No	282	40.2857	Spont labour	Checked	Unchecked	Unchecked	Unchecked	Unchecked	Unchecked	Unchecked	Unchecked	Unchecked	Unchecked	Unchecked	Unchecked	Unchecked	Unchecked	3.86	Female	77.9	No
33	1	Never	Yes	1689	770.9	2.19095	24.7	Yes	247	35.2857	No	No	276	39.4286	Spont labour	Unchecked	Unchecked	Checked	Unchecked	Unchecked	Unchecked	Unchecked	Unchecked	Unchecked	Unchecked	Unchecked	Unchecked	Unchecked	Unchecked	4.09	Male	77.9	No
29	0	Never	Yes	1507	489.9	3.07614	29.7	Yes	255	36.4286	No	No	285	40.7143	Spont labour	Checked	Unchecked	Unchecked	Unchecked	Unchecked	Unchecked	Unchecked	Unchecked	Unchecked	Unchecked	Unchecked	Unchecked	Unchecked	Unchecked	3.78	Male	54.8	No
33	0	Never	Yes	3892	359.7	10.8201	37.8	Yes	250	35.7143	No	Yes	270	38.5714	Induction of labour	Unchecked	Checked	Unchecked	Unchecked	Unchecked	Unchecked	Unchecked	Unchecked	Unchecked	Unchecked	Unchecked	Unchecked	Unchecked	Unchecked	3.04	Female	24.7	No
25	0	Ex-smoker	Yes	3850	501.3	7.68003	23	Yes	251	35.8571	No	No	280	40	Spont labour	Checked	Unchecked	Unchecked	Unchecked	Unchecked	Unchecked	Unchecked	Unchecked	Unchecked	Unchecked	Unchecked	Unchecked	Unchecked	Unchecked	3.33	Male	37.3	No
32	1	Never	Yes	4956	502.2	9.86858	23.8	Yes	257	36.7143	No	No	277	39.5714	No labour	Unchecked	Unchecked	Unchecked	Unchecked	Unchecked	Unchecked	Unchecked	Checked	Unchecked	Unchecked	Unchecked	Unchecked	Unchecked	Unchecked	3.06	Female	15.8	No
39	0	Ex-smoker	Yes	4200	117.2	35.8362	21.1	Yes	257	36.7143	No	No	282	40.2857	Spont labour	Unchecked	Checked	Unchecked	Unchecked	Unchecked	Unchecked	Unchecked	Unchecked	Unchecked	Unchecked	Unchecked	Unchecked	Unchecked	Unchecked	3.48	Female	52	No
32	0	Never	Yes	1940	190.4	10.1891	19.8	Yes	246	35.1429	No	No	287	41	Spont labour	Unchecked	Checked	Unchecked	Unchecked	Unchecked	Unchecked	Unchecked	Unchecked	Unchecked	Unchecked	Unchecked	Unchecked	Unchecked	Unchecked	3.46	Female	28.9	No
33	0	Ex-smoker	Yes	2288	168.1	13.6109	26.1	Yes	255	36.4286	No	No	283	40.4286	Induction of labour	Unchecked	Unchecked	Unchecked	Unchecked	Checked	Checked	Unchecked	Unchecked	Unchecked	Unchecked	Unchecked	Unchecked	Unchecked	Unchecked	3.55	Male	58.5	No
38	1	Ex-smoker	Yes	1975	773.4	2.55366	27.6	Yes	252	36	No	No	271	38.7143	No labour	Unchecked	Unchecked	Unchecked	Unchecked	Unchecked	Unchecked	Unchecked	Checked	Unchecked	Unchecked	Unchecked	Unchecked	Unchecked	Unchecked	3.37	Female	39.1	No
34	2	Never	Yes	2936	846.8	3.46717	22.2	Yes	251	35.8571	No	Yes	281	40.1429	Spont labour	Checked	Unchecked	Unchecked	Unchecked	Unchecked	Unchecked	Unchecked	Unchecked	Unchecked	Unchecked	Unchecked	Unchecked	Unchecked	Unchecked	3.28	Female	36.7	No
33	3	Never	Yes	1336	274.5	4.86703	22	Yes	254	36.2857	No	No	281	40.1429	Induction of labour	Checked	Unchecked	Unchecked	Unchecked	Unchecked	Unchecked	Unchecked	Unchecked	Unchecked	Unchecked	Unchecked	Unchecked	Unchecked	Unchecked	4.06	Female	85.9	No
30	0	Never	Yes	2353	207.8	11.3234	36.5	Yes	248	35.4286	No	Yes	283	40.4286	Induction of labour	Unchecked	Unchecked	Unchecked	Checked	Unchecked	Unchecked	Unchecked	Unchecked	Unchecked	Unchecked	Unchecked	Unchecked	Unchecked	Unchecked	4.16	Female	76.9	No
35	1	Ex-smoker	Yes	2050	697.5	2.93907	20.7	Yes	248	35.4286	No	No	265	37.8571	Spont labour	Unchecked	Checked	Checked	Unchecked	Unchecked	Unchecked	Unchecked	Unchecked	Unchecked	Unchecked	Unchecked	Unchecked	Unchecked	Unchecked	3.41	Female	84.3	No
36	1	Never	Yes	2449	350.5	6.98716	20.2	Yes	254	36.2857	No	Yes	280	40	Spont labour	Checked	Unchecked	Unchecked	Unchecked	Unchecked	Unchecked	Unchecked	Unchecked	Unchecked	Unchecked	Unchecked	Unchecked	Unchecked	Unchecked	4.13	Male	86.9	No
24	1	Current smoker	Yes	987.3	1571	0.628453	37.3	Yes	247	35.2857	No	No	281	40.1429	No labour	Unchecked	Unchecked	Unchecked	Unchecked	Unchecked	Unchecked	Unchecked	Checked	Unchecked	Unchecked	Unchecked	Unchecked	Unchecked	Unchecked	4.59	Male	96.5	No
29	1	Never	Yes	4489	154.4	29.0738	27.1	Yes	257	36.7143	No	No	270	38.5714	Spont labour	Checked	Unchecked	Unchecked	Unchecked	Unchecked	Unchecked	Unchecked	Unchecked	Unchecked	Unchecked	Unchecked	Unchecked	Unchecked	Unchecked	2.86	Female	12.1	No
35	2	Ex-smoker	Yes	854.4	438.5	1.94846	36.1	Yes	245	35	No	No	274	39.1429	No labour	Unchecked	Unchecked	Unchecked	Unchecked	Unchecked	Unchecked	Unchecked	Checked	Unchecked	Unchecked	Unchecked	Unchecked	Unchecked	Unchecked	3.27	Female	22.4	No
39	1	Ex-smoker	Yes	3094	218.1	14.1862	27.9	Yes	251	35.8571	No	No	275	39.2857	No labour	Unchecked	Unchecked	Unchecked	Unchecked	Unchecked	Unchecked	Unchecked	Checked	Unchecked	Unchecked	Unchecked	Unchecked	Unchecked	Unchecked	4.67	Male	99.4	No
34	2	Never	Yes	2570	131.8	19.4992	33.1	Yes	258	36.8571	No	Yes	273	39	Induction of labour	Checked	Unchecked	Unchecked	Unchecked	Unchecked	Unchecked	Unchecked	Unchecked	Unchecked	Checked	Unchecked	Unchecked	Unchecked	Unchecked	3.65	Male	40.7	No
31	0	Never	Yes	9680	77.15	125.47	21.6	Yes	249	35.5714	No	No	273	39	Spont labour	Checked	Unchecked	Unchecked	Unchecked	Unchecked	Unchecked	Unchecked	Unchecked	Unchecked	Unchecked	Unchecked	Unchecked	Unchecked	Unchecked	3.23	Male	42.7	No
30	0	Never	Yes	2002	210.8	9.49715	20.2	Yes	250	35.7143	No	No	277	39.5714	Spont labour	Unchecked	Unchecked	Checked	Unchecked	Unchecked	Unchecked	Unchecked	Unchecked	Unchecked	Unchecked	Unchecked	Unchecked	Unchecked	Unchecked	3.29	Male	35.3	No
39	1	Never	Yes	1224	516	2.37209	27.8	Yes	251	35.8571	No	No	283	40.4286	Induction of labour	Checked	Unchecked	Unchecked	Unchecked	Unchecked	Unchecked	Unchecked	Unchecked	Unchecked	Unchecked	Unchecked	Unchecked	Unchecked	Unchecked	3.76	Female	43.6	No
40	1	Never	Yes	1708	754.9	2.26255	23.8	Yes	246	35.1429	No	No	275	39.2857	Spont labour	Checked	Unchecked	Unchecked	Unchecked	Unchecked	Unchecked	Unchecked	Unchecked	Unchecked	Unchecked	Unchecked	Unchecked	Unchecked	Unchecked	4.15	Male	94	No
27	1	Never	Yes	1561	643	2.42768	22.2	Yes	245	35	No	No	289	41.2857	Spont labour	Unchecked	Checked	Unchecked	Unchecked	Unchecked	Unchecked	Unchecked	Unchecked	Unchecked	Unchecked	Unchecked	Unchecked	Unchecked	Checked	3.45	Female	33	No
36	0	Ex-smoker	Yes	2940	443.6	6.62759	27.2	Yes	254	36.2857	No	No	283	40.4286	Spont labour	Checked	Unchecked	Unchecked	Unchecked	Unchecked	Unchecked	Unchecked	Unchecked	Unchecked	Unchecked	Unchecked	Unchecked	Unchecked	Unchecked	3.64	Male	27.8	No
32	0	Never	Yes	2821	782.7	3.60419	30.5	Yes	247	35.2857	No	Yes	275	39.2857	Induction of labour	Checked	Unchecked	Unchecked	Unchecked	Unchecked	Unchecked	Unchecked	Unchecked	Unchecked	Unchecked	Unchecked	Unchecked	Unchecked	Unchecked	3.54	Female	66	No
29	0	Current smoker	Yes	2417	1447	1.67035	22.8	Yes	255	36.4286	No	No	293	41.8571	Induction of labour	Unchecked	Unchecked	Unchecked	Unchecked	Unchecked	Checked	Unchecked	Unchecked	Unchecked	Unchecked	Unchecked	Unchecked	Unchecked	Unchecked	4.05	Female	89.9	No
29	0	Ex-smoker	Yes	4855	1145	4.24017	22.2	Yes	245	35	No	No	269	38.4286	Induction of labour	Checked	Unchecked	Unchecked	Unchecked	Unchecked	Unchecked	Unchecked	Unchecked	Unchecked	Unchecked	Unchecked	Unchecked	Unchecked	Unchecked	3.13	Female	57.6	No
28	0	Never	Yes	1894	361.1	5.24508	25.9	Yes	255	36.4286	No	No	275	39.2857	Spont labour	Checked	Unchecked	Unchecked	Unchecked	Unchecked	Unchecked	Unchecked	Unchecked	Unchecked	Unchecked	Unchecked	Unchecked	Unchecked	Unchecked	2.93	Female	18	No
32	0	Never	Yes	1302	95.94	13.571	29.8	Yes	256	36.5714	No	No	290	41.4286	Induction of labour	Unchecked	Unchecked	Unchecked	Unchecked	Checked	Checked	Unchecked	Unchecked	Unchecked	Unchecked	Unchecked	Unchecked	Unchecked	Unchecked	3.38	Male	10.4	No
36	0	Never	Yes	2957	366.4	8.07041	21.4	Yes	254	36.2857	No	No	283	40.4286	Spont labour	Unchecked	Unchecked	Unchecked	Unchecked	Checked	Checked	Unchecked	Unchecked	Unchecked	Unchecked	Unchecked	Unchecked	Unchecked	Unchecked	3.85	Female	77	No
40	0	Never	Yes	2451	178.2	13.7542	22	Yes	250	35.7143	No	Yes	275	39.2857	Spont labour	Unchecked	Unchecked	Unchecked	Unchecked	Unchecked	Unchecked	Checked	Unchecked	Unchecked	Unchecked	Unchecked	Unchecked	Unchecked	Unchecked	3.08	Female	38.4	No
33	0	Never	Yes	3270	211.5	15.461	21.9	Yes	251	35.8571	No	No	287	41	Spont labour	Checked	Unchecked	Unchecked	Unchecked	Unchecked	Unchecked	Unchecked	Unchecked	Unchecked	Unchecked	Unchecked	Unchecked	Unchecked	Unchecked	3.94	Female	82.4	No
35	0	Ex-smoker	Yes	1104	458	2.41048	24.4	Yes	250	35.7143	No	No	289	41.2857	Induction of labour	Unchecked	Unchecked	Unchecked	Unchecked	Checked	Unchecked	Unchecked	Unchecked	Unchecked	Unchecked	Unchecked	Unchecked	Unchecked	Unchecked	3.63	Male	41	No
35	0	Ex-smoker	Yes	2358	89.74	26.2759	20.4	Yes	254	36.2857	No	No	276	39.4286	Induction of labour	Checked	Unchecked	Unchecked	Unchecked	Unchecked	Unchecked	Unchecked	Unchecked	Unchecked	Unchecked	Unchecked	Unchecked	Unchecked	Unchecked	2.86	Male	10	No
33	0	Never	Yes	2469	240.4	10.2704	23.6	Yes	258	36.8571	No	No	291	41.5714	Induction of labour	Unchecked	Checked	Unchecked	Unchecked	Unchecked	Unchecked	Unchecked	Unchecked	Unchecked	Unchecked	Unchecked	Unchecked	Unchecked	Unchecked	3.33	Female	21.4	No
30	0	Never	Yes	4692	125	37.536	19.9	Yes	255	36.4286	No	No	279	39.8571	Spont labour	Unchecked	Checked	Unchecked	Unchecked	Unchecked	Unchecked	Unchecked	Unchecked	Unchecked	Unchecked	Unchecked	Unchecked	Unchecked	Unchecked	3.88	Male	80.9	No
31	0	Never	Yes	5535	154.3	35.8717	19.7	Yes	248	35.4286	No	No	276	39.4286	Spont labour	Checked	Unchecked	Unchecked	Unchecked	Unchecked	Unchecked	Unchecked	Unchecked	Unchecked	Unchecked	Unchecked	Unchecked	Unchecked	Unchecked	3	Female	36.4	No
19	0	Never	Yes	4024	101.6	39.6063	29.1	Yes	251	35.8571	No	No	272	38.8571	Spont labour	Checked	Unchecked	Unchecked	Unchecked	Unchecked	Unchecked	Unchecked	Unchecked	Unchecked	Unchecked	Unchecked	Unchecked	Unchecked	Unchecked	4.03	Male	92.3	No
31	0	Never	Yes	3360	275	12.2182	20.2	Yes	253	36.1429	No	No	278	39.7143	Spont labour	Unchecked	Unchecked	Checked	Unchecked	Unchecked	Unchecked	Unchecked	Unchecked	Unchecked	Unchecked	Unchecked	Unchecked	Unchecked	Unchecked	3.24	Female	41.1	No
30	0	Never	Yes	5943	244.7	24.2869	19.5	Yes	249	35.5714	No	No	278	39.7143	Spont labour	Checked	Unchecked	Unchecked	Unchecked	Unchecked	Unchecked	Unchecked	Unchecked	Unchecked	Unchecked	Unchecked	Unchecked	Unchecked	Unchecked	3.55	Male	59.3	No
37	0	Never	Yes	7851	236.9	33.1406	26.2	Yes	249	35.5714	No	Yes	262	37.4286	Induction of labour	Unchecked	Unchecked	Unchecked	Checked	Unchecked	Unchecked	Unchecked	Unchecked	Unchecked	Unchecked	Unchecked	Unchecked	Unchecked	Unchecked	3.21	Male	67.1	No
25	0	Never	Yes	5169	250.2	20.6595	25.7	Yes	252	36	No	No	287	41	Induction of labour	Unchecked	Unchecked	Unchecked	Unchecked	Checked	Unchecked	Unchecked	Unchecked	Unchecked	Unchecked	Unchecked	Unchecked	Unchecked	Unchecked	4.71	Male	98.7	No
27	0	Never	Yes	1391	523.4	2.65762	22	Yes	253	36.1429	No	No	294	42	Induction of labour	Unchecked	Unchecked	Checked	Unchecked	Unchecked	Unchecked	Unchecked	Unchecked	Unchecked	Unchecked	Unchecked	Unchecked	Unchecked	Unchecked	3.81	Male	50.8	No
35	0	Ex-smoker	Yes	2692	456.6	5.89575	27.8	Yes	246	35.1429	No	Yes	275	39.2857	Induction of labour	Unchecked	Unchecked	Unchecked	Unchecked	Checked	Unchecked	Unchecked	Unchecked	Unchecked	Unchecked	Unchecked	Unchecked	Unchecked	Unchecked	3.73	Female	93	No
30	0	Ex-smoker	Yes	2536	238	10.6555	23.1	Yes	253	36.1429	No	No	268	38.2857	Induction of labour	Unchecked	Unchecked	Unchecked	Unchecked	Unchecked	Checked	Unchecked	Unchecked	Unchecked	Unchecked	Unchecked	Unchecked	Unchecked	Unchecked	3.33	Male	83.5	No
29	0	Never	Yes	6848	149.6	45.7754	21.1	Yes	252	36	No	No	277	39.5714	Spont labour	Unchecked	Checked	Unchecked	Unchecked	Unchecked	Unchecked	Unchecked	Unchecked	Unchecked	Unchecked	Unchecked	Unchecked	Unchecked	Unchecked	3.5	Male	64	No
21	0	Never	Yes	6142	175.7	34.9573	25.2	Yes	255	36.4286	No	No	286	40.8571	Spont labour	Checked	Unchecked	Unchecked	Unchecked	Unchecked	Unchecked	Unchecked	Unchecked	Unchecked	Unchecked	Unchecked	Unchecked	Unchecked	Unchecked	3.48	Female	52.3	No
35	0	Ex-smoker	Yes	2534	321.5	7.8818	26.5	Yes	255	36.4286	No	No	288	41.1429	Induction of labour	Unchecked	Unchecked	Unchecked	Unchecked	Checked	Unchecked	Unchecked	Unchecked	Unchecked	Unchecked	Unchecked	Unchecked	Unchecked	Unchecked	4.2	Male	87	No
31	0	Never	Yes	2272	397.3	5.7186	18.3	Yes	249	35.5714	No	No	281	40.1429	Induction of labour	Unchecked	Checked	Unchecked	Unchecked	Unchecked	Unchecked	Unchecked	Unchecked	Unchecked	Unchecked	Unchecked	Unchecked	Unchecked	Unchecked	3.6	Female	68.1	No
29	0	Never	Yes	3714	511.1	7.26668	19.5	Yes	257	36.7143	No	No	284	40.5714	Spont labour	Checked	Unchecked	Unchecked	Unchecked	Unchecked	Unchecked	Unchecked	Unchecked	Unchecked	Unchecked	Unchecked	Unchecked	Unchecked	Unchecked	3.35	Female	38.8	No
29	0	Never	Yes	1723	526.4	3.27318	22.4	Yes	254	36.2857	No	No	277	39.5714	No labour	Unchecked	Unchecked	Unchecked	Unchecked	Unchecked	Unchecked	Unchecked	Checked	Unchecked	Unchecked	Unchecked	Unchecked	Unchecked	Unchecked	3.45	Female	65.3	No
31	0	Never	Yes	2545	1244	2.04582	21.9	Yes	257	36.7143	No	No	281	40.1429	Spont labour	Unchecked	Unchecked	Unchecked	Unchecked	Unchecked	Checked	Unchecked	Unchecked	Unchecked	Unchecked	Unchecked	Unchecked	Unchecked	Unchecked	3.72	Male	71.2	No
30	0	Never	Yes	5107	114.3	44.6807	23.4	Yes	257	36.7143	No	No	277	39.5714	Spont labour	Unchecked	Unchecked	Unchecked	Unchecked	Unchecked	Checked	Unchecked	Unchecked	Unchecked	Unchecked	Unchecked	Unchecked	Unchecked	Unchecked	3.3	Male	58.1	No
22	0	Ex-smoker	Yes	1899	379.6	5.00263	20.9	Yes	252	36	No	No	284	40.5714	Induction of labour	Unchecked	Unchecked	Unchecked	Unchecked	Unchecked	Checked	Unchecked	Unchecked	Unchecked	Unchecked	Unchecked	Unchecked	Unchecked	Unchecked	3.03	Male	18.2	No
29	0	Never	Yes	2130	864.9	2.46271	19.5	Yes	246	35.1429	No	No	284	40.5714	Spont labour	Unchecked	Unchecked	Unchecked	Unchecked	Unchecked	Checked	Unchecked	Unchecked	Unchecked	Unchecked	Unchecked	Unchecked	Unchecked	Unchecked	3.73	Female	87.5	No
30	0	Never	Yes	2731	1804	1.51386	21.4	Yes	247	35.2857	No	No	284	40.5714	Induction of labour	Unchecked	Unchecked	Unchecked	Unchecked	Unchecked	Checked	Unchecked	Unchecked	Unchecked	Unchecked	Unchecked	Unchecked	Unchecked	Unchecked	3.26	Male	30.6	No
24	0	Never	Yes	5352	274.5	19.4973	22.8	Yes	257	36.7143	No	No	270	38.5714	Induction of labour	Checked	Unchecked	Unchecked	Unchecked	Unchecked	Unchecked	Unchecked	Unchecked	Unchecked	Unchecked	Unchecked	Unchecked	Unchecked	Unchecked	2.73	Female	18.7	No
33	0	Ex-smoker	Yes	2188	1911	1.14495	27.5	Yes	250	35.7143	No	Yes	264	37.7143	Induction of labour	Unchecked	Unchecked	Checked	Unchecked	Unchecked	Unchecked	Unchecked	Unchecked	Unchecked	Unchecked	Unchecked	Unchecked	Unchecked	Unchecked	3.18	Female	65.6	No
32	0	Never	Yes	7263	91.13	79.6993	19.2	Yes	249	35.5714	No	No	251	35.8571	Spont labour	Checked	Unchecked	Unchecked	Unchecked	Unchecked	Unchecked	Unchecked	Unchecked	Unchecked	Unchecked	Unchecked	Unchecked	Unchecked	Unchecked	2.49	Female	34.4	No
31	0	Never	Yes	1441	641.2	2.24735	22.2	Yes	253	36.1429	No	No	267	38.1429	No labour	Unchecked	Unchecked	Unchecked	Unchecked	Unchecked	Unchecked	Unchecked	Checked	Unchecked	Unchecked	Unchecked	Unchecked	Unchecked	Unchecked	2.94	Male	28.3	No
34	0	Never	Yes	4118	271.2	15.1844	28.4	Yes	246	35.1429	No	No	269	38.4286	No labour	Unchecked	Unchecked	Unchecked	Unchecked	Unchecked	Unchecked	Unchecked	Checked	Unchecked	Unchecked	Unchecked	Unchecked	Unchecked	Unchecked	2.9	Female	15.8	No
25	0	Never	Yes	5263	337.7	15.5848	21.5	Yes	252	36	No	No	269	38.4286	Spont labour	Checked	Unchecked	Unchecked	Unchecked	Unchecked	Unchecked	Unchecked	Unchecked	Unchecked	Unchecked	Unchecked	Unchecked	Unchecked	Unchecked	3	Male	25.2	No
32	0	Ex-smoker	Yes	3953	1213	3.25886	28.5	Yes	251	35.8571	No	No	274	39.1429	Spont labour	Checked	Unchecked	Unchecked	Unchecked	Unchecked	Unchecked	Unchecked	Unchecked	Unchecked	Checked	Unchecked	Unchecked	Unchecked	Unchecked	3.59	Female	81.2	No
34	0	Never	Yes	10788	96.57	111.712	26.1	Yes	256	36.5714	No	No	269	38.4286	Spont labour	Unchecked	Unchecked	Checked	Unchecked	Unchecked	Unchecked	Unchecked	Unchecked	Unchecked	Unchecked	Unchecked	Unchecked	Unchecked	Unchecked	2.8	Female	15	No
27	0	Never	Yes	1808	475.4	3.80311	26.6	Yes	255	36.4286	No	Yes	271	38.7143	No labour	Unchecked	Unchecked	Unchecked	Unchecked	Unchecked	Unchecked	Unchecked	Checked	Unchecked	Unchecked	Unchecked	Unchecked	Unchecked	Unchecked	2.99	Female	30.2	No
28	0	Never	Yes	1094	902.8	1.21179	31.2	Yes	254	36.2857	No	No	267	38.1429	Induction of labour	Checked	Unchecked	Unchecked	Unchecked	Unchecked	Unchecked	Unchecked	Unchecked	Unchecked	Unchecked	Unchecked	Unchecked	Unchecked	Unchecked	2.95	Male	17.7	No
26	0	Never	Yes	1675	755.5	2.21707	23.7	Yes	255	36.4286	No	No	280	40	Induction of labour	Unchecked	Checked	Unchecked	Unchecked	Unchecked	Unchecked	Unchecked	Unchecked	Unchecked	Unchecked	Unchecked	Unchecked	Unchecked	Unchecked	3.21	Female	26.7	No
37	0	Ex-smoker	Yes	3655	331.1	11.039	24.6	Yes	256	36.5714	No	No	281	40.1429	Spont labour	Unchecked	Checked	Unchecked	Unchecked	Unchecked	Unchecked	Unchecked	Unchecked	Unchecked	Unchecked	Unchecked	Unchecked	Unchecked	Unchecked	3.86	Female	77.8	No
39	0	Ex-smoker	Yes	1344	150	8.96	24.4	Yes	248	35.4286	No	No	280	40	Induction of labour	Unchecked	Checked	Unchecked	Unchecked	Unchecked	Unchecked	Unchecked	Unchecked	Unchecked	Unchecked	Unchecked	Unchecked	Unchecked	Unchecked	3.29	Male	32.6	No
31	0	Never	Yes	4612	138.2	33.3719	24.1	Yes	255	36.4286	No	Yes	277	39.5714	Spont labour	Unchecked	Unchecked	Unchecked	Unchecked	Unchecked	Checked	Unchecked	Unchecked	Unchecked	Unchecked	Unchecked	Unchecked	Unchecked	Unchecked	4.13	Male	92.3	No
28	0	Never	Yes	3551	144.2	24.6255	20.2	Yes	254	36.2857	No	No	277	39.5714	Spont labour	Unchecked	Unchecked	Checked	Unchecked	Unchecked	Unchecked	Unchecked	Unchecked	Unchecked	Unchecked	Unchecked	Unchecked	Unchecked	Unchecked	3.53	Male	71.8	No
22	0	Current smoker	Yes	2595	250.3	10.3676	23.6	Yes	250	35.7143	No	Yes	270	38.5714	Induction of labour	Unchecked	Unchecked	Unchecked	Unchecked	Checked	Unchecked	Unchecked	Unchecked	Unchecked	Unchecked	Unchecked	Unchecked	Unchecked	Unchecked	2.96	Male	17.5	No
26	0	Never	Yes	5235	115.1	45.4822	21.5	Yes	258	36.8571	No	No	272	38.8571	Spont labour	Checked	Unchecked	Unchecked	Unchecked	Unchecked	Unchecked	Unchecked	Unchecked	Unchecked	Unchecked	Unchecked	Unchecked	Unchecked	Unchecked	3.53	Male	74	No
30	0	Never	Yes	1645	2031	0.809946	21.3	Yes	252	36	No	No	284	40.5714	Spont labour	Unchecked	Checked	Unchecked	Unchecked	Unchecked	Unchecked	Unchecked	Unchecked	Unchecked	Unchecked	Unchecked	Unchecked	Unchecked	Unchecked	3.94	Female	91.2	No
24	0	Never	Yes	2792	94.71	29.4795	20.3	Yes	252	36	No	No	282	40.2857	Spont labour	Unchecked	Checked	Checked	Unchecked	Unchecked	Unchecked	Unchecked	Unchecked	Unchecked	Checked	Unchecked	Unchecked	Unchecked	Unchecked	3.66	Female	60.2	No
27	0	Ex-smoker	Yes	2208	214	10.3178	23.9	Yes	253	36.1429	No	No	287	41	Spont labour	Unchecked	Checked	Unchecked	Unchecked	Unchecked	Unchecked	Unchecked	Unchecked	Unchecked	Unchecked	Unchecked	Unchecked	Unchecked	Unchecked	3.46	Male	29.3	No
30	0	Never	Yes	1488	258.5	5.75629	33.2	Yes	246	35.1429	No	No	281	40.1429	Induction of labour	Unchecked	Unchecked	Unchecked	Checked	Unchecked	Unchecked	Unchecked	Unchecked	Unchecked	Unchecked	Unchecked	Unchecked	Unchecked	Unchecked	4.28	Male	93.4	No
23	0	Current smoker	Yes	2226	2727	0.816282	23.6	Yes	247	35.2857	No	No	287	41	Induction of labour	Checked	Unchecked	Unchecked	Unchecked	Unchecked	Unchecked	Unchecked	Unchecked	Unchecked	Unchecked	Unchecked	Unchecked	Unchecked	Unchecked	3.28	Female	27.7	No
27	0	Ex-smoker	Yes	1319	376.8	3.50053	23.7	Yes	249	35.5714	No	No	289	41.2857	Induction of labour	Unchecked	Checked	Unchecked	Unchecked	Unchecked	Unchecked	Unchecked	Unchecked	Unchecked	Unchecked	Unchecked	Unchecked	Unchecked	Unchecked	4.04	Female	70.6	No
28	0	Never	Yes	1388	117.2	11.843	25.8	Yes	254	36.2857	No	No	283	40.4286	Spont labour	Checked	Unchecked	Unchecked	Unchecked	Unchecked	Unchecked	Unchecked	Unchecked	Unchecked	Unchecked	Unchecked	Unchecked	Unchecked	Unchecked	3.39	Female	34.9	No
27	0	Ex-smoker	Yes	2411	282.2	8.54359	26.9	Yes	256	36.5714	No	No	279	39.8571	Spont labour	Checked	Unchecked	Unchecked	Unchecked	Unchecked	Unchecked	Unchecked	Unchecked	Unchecked	Unchecked	Unchecked	Unchecked	Unchecked	Unchecked	3.48	Female	35.6	No
30	0	Never	Yes	2071	135.6	15.2729	28	Yes	254	36.2857	No	No	281	40.1429	Induction of labour	Checked	Unchecked	Unchecked	Unchecked	Unchecked	Unchecked	Unchecked	Unchecked	Unchecked	Unchecked	Unchecked	Unchecked	Unchecked	Unchecked	3.11	Female	20.2	No
32	0	Ex-smoker	Yes	2527	977.5	2.58517	30.7	Yes	256	36.5714	No	No	274	39.1429	Induction of labour	Unchecked	Checked	Unchecked	Unchecked	Unchecked	Unchecked	Unchecked	Unchecked	Unchecked	Unchecked	Unchecked	Unchecked	Unchecked	Unchecked	3.34	Female	34.6	No
26	0	Never	Yes	2983	174.8	17.0652	23.2	Yes	250	35.7143	No	No	278	39.7143	Spont labour	Unchecked	Unchecked	Unchecked	Unchecked	Unchecked	Checked	Unchecked	Unchecked	Unchecked	Unchecked	Unchecked	Unchecked	Unchecked	Unchecked	4.19	Male	94.2	No
33	0	Never	Yes	4373	122.3	35.7563	20.6	Yes	253	36.1429	No	No	268	38.2857	Induction of labour	Checked	Unchecked	Unchecked	Unchecked	Unchecked	Unchecked	Unchecked	Unchecked	Unchecked	Checked	Unchecked	Unchecked	Unchecked	Unchecked	3.23	Male	65.9	No
40	0	Ex-smoker	Yes	1848	94.4	19.5763	26.7	Yes	248	35.4286	No	Yes	272	38.8571	Induction of labour	Unchecked	Unchecked	Unchecked	Unchecked	Unchecked	Checked	Unchecked	Unchecked	Unchecked	Unchecked	Unchecked	Unchecked	Unchecked	Unchecked	3.37	Female	63.1	No
36	0	Never	Yes	3201	104.6	30.6023	27	Yes	251	35.8571	No	No	286	40.8571	Induction of labour	Checked	Unchecked	Unchecked	Unchecked	Unchecked	Unchecked	Unchecked	Unchecked	Unchecked	Unchecked	Unchecked	Unchecked	Unchecked	Unchecked	3.41	Male	22.9	No
29	0	Never	Yes	1862	1098	1.69581	28	Yes	250	35.7143	No	No	282	40.2857	Induction of labour	Unchecked	Unchecked	Unchecked	Unchecked	Checked	Unchecked	Unchecked	Unchecked	Unchecked	Unchecked	Unchecked	Unchecked	Unchecked	Unchecked	3.94	Female	89.9	No
33	0	Never	Yes	2344	149.7	15.658	25.3	Yes	254	36.2857	No	No	281	40.1429	Induction of labour	Checked	Unchecked	Unchecked	Unchecked	Unchecked	Unchecked	Unchecked	Unchecked	Unchecked	Unchecked	Unchecked	Unchecked	Unchecked	Unchecked	3.19	Male	16.5	No
23	0	Never	Yes	2395	241.7	9.90898	22.6	Yes	258	36.8571	No	No	290	41.4286	Induction of labour	Checked	Unchecked	Unchecked	Unchecked	Unchecked	Unchecked	Unchecked	Unchecked	Unchecked	Unchecked	Unchecked	Unchecked	Unchecked	Unchecked	3.08	Female	11.3	No
30	0	Never	Yes	2984	526.7	5.66546	21.5	Yes	247	35.2857	No	No	284	40.5714	Spont labour	Checked	Unchecked	Unchecked	Unchecked	Unchecked	Unchecked	Unchecked	Unchecked	Unchecked	Unchecked	Unchecked	Unchecked	Unchecked	Unchecked	3.8	Female	79.8	No
26	0	Never	Yes	1578	507.3	3.11059	26.2	Yes	252	36	No	No	272	38.8571	Induction of labour	Unchecked	Checked	Unchecked	Unchecked	Unchecked	Unchecked	Unchecked	Unchecked	Unchecked	Unchecked	Unchecked	Unchecked	Unchecked	Unchecked	2.79	Female	13.9	No
35	1	Never	Yes	1986	159	12.4906	40.4	Yes	252	36	No	Yes	280	40	Induction of labour	Checked	Unchecked	Unchecked	Unchecked	Unchecked	Unchecked	Unchecked	Unchecked	Unchecked	Unchecked	Unchecked	Unchecked	Unchecked	Unchecked	3.55	Male	17.3	No
38	0	Never	Yes	3423	81.81	41.8409	22.6	Yes	250	35.7143	No	No	288	41.1429	Spont labour	Unchecked	Unchecked	Unchecked	Unchecked	Unchecked	Checked	Unchecked	Unchecked	Unchecked	Unchecked	Unchecked	Unchecked	Unchecked	Unchecked	4.01	Female	86.6	No
31	1	Never	Yes	1001	663.2	1.50935	21.5	Yes	251	35.8571	No	No	288	41.1429	Induction of labour	Checked	Unchecked	Unchecked	Unchecked	Unchecked	Unchecked	Unchecked	Unchecked	Unchecked	Unchecked	Unchecked	Unchecked	Unchecked	Unchecked	3.32	Female	20	No
35	1	Never	Yes	2259	194	11.6443	22.4	Yes	251	35.8571	No	No	287	41	No labour	Unchecked	Unchecked	Unchecked	Unchecked	Unchecked	Unchecked	Unchecked	Checked	Unchecked	Unchecked	Unchecked	Unchecked	Unchecked	Unchecked	3.98	Male	65.8	No
38	2	Never	Yes	2557	394.4	6.48327	20.4	Yes	254	36.2857	No	No	268	38.2857	Spont labour	Checked	Unchecked	Unchecked	Unchecked	Unchecked	Unchecked	Unchecked	Unchecked	Unchecked	Unchecked	Unchecked	Unchecked	Unchecked	Unchecked	4.07	Male	97.2	No
28	0	Current smoker	Yes	5967	159.5	37.4107	20.4	Yes	247	35.2857	No	Yes	280	40	Spont labour	Unchecked	Unchecked	Unchecked	Unchecked	Checked	Unchecked	Unchecked	Unchecked	Unchecked	Unchecked	Unchecked	Unchecked	Unchecked	Unchecked	3.65	Male	77.6	No

## Sheet: SGA only
Age (years)	Parity	Smoking status	Informed Consent	sFlt-1	PlGF	sFlt1/PlGF	BMI at booking	Completed 36 week blood test	Gestation at 36/40 bloods days	Gestation at 36 FLAG blood test in weeks	Changed hypertension status since 28/40	Gestational Diabetes this pregnancy	Gestation at delivery in days	Gestation at delivery in weeks	Onset of delivery	Mode of Delivery (choice=NVD)	Mode of Delivery (choice=Instrumental for fetal distress)	Mode of Delivery (choice=Instrumental for FTP in S2)	Mode of Delivery (choice=Non-urgent C/S for failed IOL)	Mode of Delivery (choice=Em C/S for fetal distress)	Mode of Delivery (choice=Em C/S for dystocia)	Mode of Delivery (choice=Em C/S for planned C/S in labour or with SROM)	Mode of Delivery (choice=Elective C/S)	Mode of Delivery (choice=Instrumental delivery for maternal medical condition)	Complications (choice=Gestational Hypertension)	Complications (choice=Preeclampsia)	Complications (choice=HELLP)	Complications (choice=Eclampsia)	Complications (choice=Placental Abruption)	Birth Weight (kg)	Baby Gender	Birth weight centile	birth centile less than 10th
39	1	Current smoker	Yes	2432	116	20.9655	40.5	Yes	252	36	No	No	276	39.4286	Spont labour	Checked	Unchecked	Unchecked	Unchecked	Unchecked	Unchecked	Unchecked	Unchecked	Unchecked	Unchecked	Unchecked	Unchecked	Unchecked	Unchecked	2.04	Female	0	Yes
34	1	Ex-smoker	Yes	4327	148.6	29.1184	23.9	Yes	254	36.2857	No	No	276	39.4286	Induction of labour	Checked	Unchecked	Unchecked	Unchecked	Unchecked	Unchecked	Unchecked	Unchecked	Unchecked	Unchecked	Unchecked	Unchecked	Unchecked	Unchecked	2.41	Female	0.2	Yes
35	1	Never	Yes	10301	842.7	12.2238	21.5	Yes	247	35.2857	No	No	269	38.4286	No labour	Unchecked	Unchecked	Unchecked	Unchecked	Unchecked	Unchecked	Unchecked	Checked	Unchecked	Unchecked	Unchecked	Unchecked	Unchecked	Unchecked	2.09	Female	0.2	Yes
31	1	Never	Yes	1227	547.2	2.24232	21.6	Yes	257	36.7143	No	Yes	274	39.1429	No labour	Unchecked	Unchecked	Unchecked	Unchecked	Unchecked	Unchecked	Unchecked	Checked	Unchecked	Unchecked	Unchecked	Unchecked	Unchecked	Unchecked	2.11	Female	0.2	Yes
37	2	Never	Yes	4071	33.78	120.515	21.1	Yes	248	35.4286	No	No	252	36	No labour	Unchecked	Unchecked	Unchecked	Unchecked	Unchecked	Unchecked	Checked	Unchecked	Unchecked	Unchecked	Unchecked	Unchecked	Unchecked	Unchecked	1.96	Male	0.4	Yes
31	1	Never	Yes	2888	1321	2.18622	20.1	Yes	245	35	No	No	258	36.8571	No labour	Unchecked	Unchecked	Unchecked	Unchecked	Checked	Unchecked	Unchecked	Unchecked	Unchecked	Unchecked	Unchecked	Unchecked	Unchecked	Unchecked	1.97	Female	0.75	Yes
25	0	Never	Yes	2585	122.1	21.1712	37.8	Yes	250	35.7143	No	No	251	35.8571	No labour	Unchecked	Unchecked	Unchecked	Unchecked	Unchecked	Unchecked	Unchecked	Checked	Unchecked	Unchecked	Unchecked	Unchecked	Unchecked	Unchecked	2.02	Male	0.8	Yes
30	0	Never	Yes	4443	125.3	35.4589	26.3	Yes	253	36.1429	No	No	264	37.7143	Spont labour	Checked	Unchecked	Unchecked	Unchecked	Unchecked	Unchecked	Unchecked	Unchecked	Unchecked	Unchecked	Unchecked	Unchecked	Unchecked	Unchecked	2.22	Female	0.9	Yes
29	0	Never	Yes	7425	228.9	32.4377	29.7	Yes	251	35.8571	No	No	289	41.2857	Induction of labour	Unchecked	Checked	Unchecked	Unchecked	Unchecked	Unchecked	Unchecked	Unchecked	Unchecked	Unchecked	Unchecked	Unchecked	Unchecked	Unchecked	2.84	Male	1	Yes
40	1	Ex-smoker	Yes	4669	94.74	49.2822	22.9	Yes	257	36.7143	No	No	290	41.4286	No labour	Unchecked	Unchecked	Unchecked	Unchecked	Unchecked	Unchecked	Unchecked	Checked	Unchecked	Unchecked	Unchecked	Unchecked	Unchecked	Unchecked	2.88	Male	1.1	Yes
29	0	Ex-smoker	Yes	5741	60.85	94.3468	26.6	Yes	257	36.7143	No	No	272	38.8571	No labour	Unchecked	Unchecked	Unchecked	Unchecked	Unchecked	Unchecked	Unchecked	Checked	Unchecked	Unchecked	Unchecked	Unchecked	Unchecked	Unchecked	2.45	Female	1.1	Yes
35	0	Never	Yes	1683	161.1	10.4469	23.8	Yes	250	35.7143	No	No	268	38.2857	No labour	Unchecked	Unchecked	Unchecked	Unchecked	Unchecked	Unchecked	Unchecked	Checked	Unchecked	Checked	Unchecked	Unchecked	Unchecked	Unchecked	2.32	Female	1.5	Yes
32	1	Ex-smoker	Yes	1217	565	2.15398	41.9	Yes	258	36.8571	No	No	279	39.8571	Induction of labour	Unchecked	Checked	Unchecked	Unchecked	Unchecked	Unchecked	Unchecked	Unchecked	Unchecked	Unchecked	Unchecked	Unchecked	Unchecked	Unchecked	2.89	Female	1.6	Yes
31	0	Never	Yes	1691	167.1	10.1197	21.6	Yes	253	36.1429	No	No	261	37.2857	Induction of labour	Checked	Unchecked	Unchecked	Unchecked	Unchecked	Unchecked	Unchecked	Unchecked	Unchecked	Unchecked	Unchecked	Unchecked	Unchecked	Unchecked	2.22	Female	1.7	Yes
38	2	Never	Yes	2598	242.4	10.7178	21.2	Yes	247	35.2857	No	No	259	37	Spont labour	Checked	Unchecked	Unchecked	Unchecked	Unchecked	Unchecked	Unchecked	Unchecked	Unchecked	Unchecked	Unchecked	Unchecked	Unchecked	Unchecked	2.15	Female	1.8	Yes
33	0	Ex-smoker	Yes	3838	77.12	49.7666	21.9	Yes	252	36	No	No	262	37.4286	No labour	Unchecked	Unchecked	Unchecked	Unchecked	Unchecked	Unchecked	Unchecked	Checked	Unchecked	Unchecked	Unchecked	Unchecked	Unchecked	Unchecked	2.27	Male	1.9	Yes
34	0	Ex-smoker	Yes	2312	158	14.6329	20.8	Yes	253	36.1429	No	No	279	39.8571	Spont labour	Unchecked	Checked	Unchecked	Unchecked	Unchecked	Unchecked	Unchecked	Unchecked	Unchecked	Unchecked	Unchecked	Unchecked	Unchecked	Unchecked	2.67	Male	2	Yes
37	2	Current smoker	Yes	919.6	1241	0.741015	27.2	Yes	255	36.4286	No	No	265	37.8571	Induction of labour	Checked	Unchecked	Unchecked	Unchecked	Unchecked	Unchecked	Unchecked	Unchecked	Unchecked	Unchecked	Unchecked	Unchecked	Unchecked	Unchecked	2.52	Male	2.1	Yes
22	1	Current smoker	Yes	2603	408.2	6.37678	22.9	Yes	251	35.8571	No	No	281	40.1429	Spont labour	Checked	Unchecked	Unchecked	Unchecked	Unchecked	Unchecked	Unchecked	Unchecked	Unchecked	Unchecked	Unchecked	Unchecked	Unchecked	Unchecked	2.82	Male	2.1	Yes
33	0	Never	Yes	3895	123.6	31.5129	23.7	Yes	256	36.5714	No	No	275	39.2857	Induction of labour	Checked	Unchecked	Unchecked	Unchecked	Unchecked	Unchecked	Unchecked	Unchecked	Unchecked	Unchecked	Unchecked	Unchecked	Unchecked	Unchecked	2.67	Male	2.1	Yes
35	0	Never	Yes	6671	42.25	157.893	33.2	Yes	256	36.5714	No	Yes	269	38.4286	Induction of labour	Unchecked	Unchecked	Unchecked	Unchecked	Checked	Unchecked	Unchecked	Unchecked	Unchecked	Checked	Unchecked	Unchecked	Unchecked	Unchecked	2.48	Female	2.2	Yes
29	0	Never	Yes	12169	110.2	110.426	32	Yes	252	36	No	Yes	258	36.8571	Induction of labour	Unchecked	Unchecked	Unchecked	Unchecked	Checked	Checked	Unchecked	Unchecked	Unchecked	Unchecked	Unchecked	Unchecked	Unchecked	Unchecked	2.24	Male	2.4	Yes
26	1	Current smoker	Yes	1235	570.5	2.16477	30.4	Yes	254	36.2857	No	No	280	40	Induction of labour	Checked	Unchecked	Unchecked	Unchecked	Unchecked	Unchecked	Unchecked	Unchecked	Unchecked	Unchecked	Unchecked	Unchecked	Unchecked	Unchecked	3	Male	2.6	Yes
37	2	Current smoker	Yes	933.5	644.4	1.44863	34.3	Yes	248	35.4286	No	No	271	38.7143	No labour	Unchecked	Unchecked	Unchecked	Unchecked	Unchecked	Unchecked	Unchecked	Checked	Unchecked	Unchecked	Unchecked	Unchecked	Unchecked	Unchecked	2.76	Female	2.6	Yes
33	1	Ex-smoker	Yes	1789	202.6	8.83021	24.6	Yes	258	36.8571	No	Yes	274	39.1429	Spont labour	Checked	Unchecked	Unchecked	Unchecked	Unchecked	Unchecked	Unchecked	Unchecked	Unchecked	Checked	Unchecked	Unchecked	Unchecked	Unchecked	2.58	Female	2.7	Yes
36	0	Never	Yes	2254	108.3	20.8126	28.5	Yes	253	36.1429	Gestational Hypertension	No	276	39.4286	Induction of labour	Unchecked	Checked	Unchecked	Unchecked	Unchecked	Unchecked	Unchecked	Unchecked	Unchecked	Checked	Unchecked	Unchecked	Unchecked	Unchecked	2.68	Male	2.7	Yes
25	0	Never	Yes	3093	1138	2.71793	19.2	Yes	252	36	No	No	283	40.4286	Induction of labour	Checked	Unchecked	Unchecked	Unchecked	Unchecked	Unchecked	Unchecked	Unchecked	Unchecked	Unchecked	Unchecked	Unchecked	Unchecked	Unchecked	2.75	Male	2.9	Yes
37	1	Never	Yes	3528	249.4	14.146	24.4	Yes	252	36	No	Yes	272	38.8571	Induction of labour	Checked	Unchecked	Unchecked	Unchecked	Unchecked	Unchecked	Unchecked	Unchecked	Unchecked	Unchecked	Unchecked	Unchecked	Unchecked	Unchecked	2.65	Female	3.2	Yes
28	0	Ex-smoker	Yes	2950	314.1	9.39191	26.4	Yes	255	36.4286	No	Yes	260	37.1429	Induction of labour	Unchecked	Checked	Unchecked	Unchecked	Unchecked	Unchecked	Unchecked	Unchecked	Unchecked	Unchecked	Unchecked	Unchecked	Unchecked	Unchecked	2.24	Female	3.4	Yes
28	0	Ex-smoker	Yes	2539	267.6	9.48804	26.3	Yes	251	35.8571	No	No	283	40.4286	Induction of labour	Checked	Unchecked	Unchecked	Unchecked	Unchecked	Unchecked	Unchecked	Unchecked	Unchecked	Checked	Unchecked	Unchecked	Unchecked	Unchecked	2.85	Female	3.5	Yes
24	0	Never	Yes	3531	79.24	44.5608	19.4	Yes	259	37	No	No	288	41.1429	Induction of labour	Checked	Unchecked	Unchecked	Unchecked	Unchecked	Unchecked	Unchecked	Unchecked	Unchecked	Unchecked	Unchecked	Unchecked	Unchecked	Unchecked	2.83	Female	3.7	Yes
34	1	Never	Yes	4340	58.04	74.776	31.6	Yes	257	36.7143	No	No	284	40.5714	Spont labour	Checked	Unchecked	Unchecked	Unchecked	Unchecked	Unchecked	Unchecked	Unchecked	Unchecked	Unchecked	Unchecked	Unchecked	Unchecked	Unchecked	3.09	Male	3.8	Yes
37	1	Never	Yes	3099	358.3	8.64918	23.7	Yes	258	36.8571	No	Yes	266	38	No labour	Unchecked	Unchecked	Unchecked	Unchecked	Unchecked	Unchecked	Unchecked	Checked	Unchecked	Unchecked	Unchecked	Unchecked	Unchecked	Unchecked	2.58	Male	3.8	Yes
26	0	Never	Yes	2571	167.3	15.3676	20	Yes	254	36.2857	No	No	262	37.4286	Induction of labour	Checked	Unchecked	Unchecked	Unchecked	Unchecked	Unchecked	Unchecked	Unchecked	Unchecked	Unchecked	Unchecked	Unchecked	Unchecked	Unchecked	2.38	Male	3.8	Yes
27	0	Never	Yes	2535	193.9	13.0737	21.8	Yes	254	36.2857	No	No	265	37.8571	Induction of labour	Checked	Unchecked	Unchecked	Unchecked	Unchecked	Unchecked	Unchecked	Unchecked	Unchecked	Unchecked	Unchecked	Unchecked	Unchecked	Unchecked	2.36	Male	3.8	Yes
35	1	Never	Yes	1835	203	9.03941	39.4	Yes	254	36.2857	No	Yes	272	38.8571	Spont labour	Unchecked	Unchecked	Unchecked	Unchecked	Unchecked	Unchecked	Checked	Unchecked	Unchecked	Unchecked	Unchecked	Unchecked	Unchecked	Checked	2.74	Female	3.9	Yes
25	0	Never	Yes	7109	32.11	221.395	24.1	Yes	256	36.5714	Gestational Hypertension	No	260	37.1429	Induction of labour	Unchecked	Checked	Unchecked	Unchecked	Unchecked	Unchecked	Unchecked	Unchecked	Unchecked	Checked	Unchecked	Unchecked	Unchecked	Unchecked	2.45	Male	4.2	Yes
32	1	Ex-smoker	Yes	1284	840.9	1.52694	32.1	Yes	245	35	No	No	276	39.4286	Spont labour	Checked	Unchecked	Unchecked	Unchecked	Unchecked	Unchecked	Unchecked	Unchecked	Unchecked	Unchecked	Unchecked	Unchecked	Unchecked	Unchecked	2.93	Female	4.3	Yes
29	0	Ex-smoker	Yes	2545	199.9	12.7314	20.7	Yes	252	36	No	No	280	40	Spont labour	Unchecked	Checked	Unchecked	Unchecked	Unchecked	Unchecked	Unchecked	Unchecked	Unchecked	Checked	Unchecked	Unchecked	Unchecked	Unchecked	2.88	Male	4.3	Yes
30	0	Never	Yes	2164	480.6	4.5027	21.9	Yes	249	35.5714	No	No	283	40.4286	Spont labour	Unchecked	Checked	Unchecked	Unchecked	Unchecked	Unchecked	Unchecked	Unchecked	Unchecked	Unchecked	Unchecked	Unchecked	Unchecked	Unchecked	2.85	Male	4.6	Yes
28	2	Never	Yes	2275	132.3	17.1958	33.7	Yes	253	36.1429	No	No	269	38.4286	No labour	Unchecked	Unchecked	Unchecked	Unchecked	Unchecked	Unchecked	Unchecked	Checked	Unchecked	Unchecked	Unchecked	Unchecked	Unchecked	Unchecked	2.93	Male	4.7	Yes
30	0	Never	Yes	1084	817	1.32681	22.3	Yes	251	35.8571	No	No	252	36	No labour	Unchecked	Unchecked	Unchecked	Unchecked	Unchecked	Unchecked	Unchecked	Checked	Unchecked	Unchecked	Unchecked	Unchecked	Unchecked	Unchecked	2.21	Female	4.8	Yes
24	1	Ex-smoker	Yes	3074	68.7	44.7453	30.1	Yes	257	36.7143	No	No	285	40.7143	Spont labour	Checked	Unchecked	Unchecked	Unchecked	Unchecked	Unchecked	Unchecked	Unchecked	Unchecked	Unchecked	Unchecked	Unchecked	Unchecked	Unchecked	3.24	Male	5	Yes
36	1	Never	Yes	1632	571.3	2.85664	22.9	Yes	247	35.2857	No	No	267	38.1429	Spont labour	Checked	Unchecked	Unchecked	Unchecked	Unchecked	Unchecked	Unchecked	Unchecked	Unchecked	Unchecked	Unchecked	Unchecked	Unchecked	Unchecked	2.61	Female	5.1	Yes
36	1	Ex-smoker	Yes	2535	372.8	6.79989	20	Yes	252	36	No	Yes	268	38.2857	No labour	Unchecked	Unchecked	Unchecked	Unchecked	Unchecked	Unchecked	Unchecked	Checked	Unchecked	Unchecked	Unchecked	Unchecked	Unchecked	Unchecked	2.69	Male	5.1	Yes
34	1	Never	Yes	2675	84.85	31.5262	28.3	Yes	257	36.7143	No	Yes	261	37.2857	Spont labour	Checked	Unchecked	Unchecked	Unchecked	Unchecked	Unchecked	Unchecked	Unchecked	Unchecked	Unchecked	Unchecked	Unchecked	Unchecked	Unchecked	2.61	Male	5.2	Yes
31	0	Never	Yes	5273	68.77	76.6759	26.6	Yes	251	35.8571	No	No	280	40	Spont labour	Checked	Unchecked	Unchecked	Unchecked	Unchecked	Unchecked	Unchecked	Unchecked	Unchecked	Unchecked	Unchecked	Unchecked	Unchecked	Unchecked	2.92	Male	5.2	Yes
28	0	Ex-smoker	Yes	7848	47.88	163.91	25.1	Yes	259	37	No	No	275	39.2857	Spont labour	Checked	Unchecked	Unchecked	Unchecked	Unchecked	Unchecked	Unchecked	Unchecked	Unchecked	Unchecked	Unchecked	Unchecked	Unchecked	Unchecked	2.87	Male	5.6	Yes
28	0	Never	Yes	4099	123	33.3252	17.9	Yes	250	35.7143	No	No	253	36.1429	Induction of labour	Checked	Unchecked	Unchecked	Unchecked	Unchecked	Unchecked	Unchecked	Unchecked	Unchecked	Unchecked	Unchecked	Unchecked	Unchecked	Unchecked	2.27	Male	5.8	Yes
32	0	Never	Yes	5926	92.9	63.789	24.8	Yes	255	36.4286	Gestational Hypertension	No	265	37.8571	Induction of labour	Unchecked	Unchecked	Unchecked	Unchecked	Checked	Unchecked	Unchecked	Unchecked	Unchecked	Checked	Unchecked	Unchecked	Unchecked	Unchecked	2.59	Female	6.2	Yes
26	0	Never	Yes	3511	105.7	33.2167	24	Yes	252	36	No	No	291	41.5714	Spont labour	Unchecked	Unchecked	Unchecked	Unchecked	Checked	Unchecked	Unchecked	Unchecked	Unchecked	Unchecked	Unchecked	Unchecked	Unchecked	Unchecked	3	Female	6.3	Yes
33	0	Ex-smoker	Yes	1687	391.4	4.31017	23.6	Yes	249	35.5714	No	No	276	39.4286	Induction of labour	Checked	Unchecked	Unchecked	Unchecked	Unchecked	Unchecked	Unchecked	Unchecked	Unchecked	Unchecked	Unchecked	Unchecked	Unchecked	Unchecked	2.76	Female	6.3	Yes
32	0	Never	Yes	1529	1775	0.861408	24.3	Yes	256	36.5714	No	Yes	274	39.1429	Induction of labour	Unchecked	Unchecked	Checked	Unchecked	Unchecked	Unchecked	Unchecked	Unchecked	Unchecked	Unchecked	Unchecked	Unchecked	Unchecked	Unchecked	2.72	Male	6.5	Yes
35	0	Never	Yes	Insufficient due to instrument error	249.9	#VALUE!	31.6	Yes	249	35.5714	No	Yes	280	40	Induction of labour	Checked	Unchecked	Unchecked	Unchecked	Unchecked	Unchecked	Unchecked	Unchecked	Unchecked	Unchecked	Unchecked	Unchecked	Unchecked	Unchecked	2.95	Male	6.6	Yes
30	0	Ex-smoker	Yes	1812	144.2	12.5659	20.3	Yes	253	36.1429	No	No	279	39.8571	Induction of labour	Unchecked	Checked	Unchecked	Unchecked	Unchecked	Unchecked	Unchecked	Unchecked	Unchecked	Unchecked	Unchecked	Unchecked	Unchecked	Unchecked	2.7	Female	6.6	Yes
37	1	Never	Yes	1115	705.6	1.58022	21.2	Yes	255	36.4286	No	No	287	41	Spont labour	Checked	Unchecked	Unchecked	Unchecked	Unchecked	Unchecked	Unchecked	Unchecked	Unchecked	Unchecked	Unchecked	Unchecked	Unchecked	Unchecked	3.15	Female	6.8	Yes
30	0	Ex-smoker	Yes	4406	89.11	49.4445	29.4	Yes	255	36.4286	No	No	270	38.5714	Induction of labour	Checked	Unchecked	Unchecked	Unchecked	Unchecked	Unchecked	Unchecked	Unchecked	Unchecked	Unchecked	Unchecked	Unchecked	Unchecked	Unchecked	2.82	Male	6.8	Yes
33	0	Ex-smoker	Yes	4885	276.1	17.6929	22.1	Yes	257	36.7143	No	No	289	41.2857	Induction of labour	Unchecked	Unchecked	Unchecked	Unchecked	Checked	Checked	Unchecked	Unchecked	Unchecked	Checked	Unchecked	Unchecked	Unchecked	Unchecked	2.99	Female	6.9	Yes
35	1	Never	Yes	4182	104.5	40.0191	37.3	Yes	256	36.5714	No	No	279	39.8571	Spont labour	Unchecked	Unchecked	Unchecked	Unchecked	Unchecked	Checked	Unchecked	Unchecked	Unchecked	Checked	Unchecked	Unchecked	Unchecked	Unchecked	3.13	Male	6.95	Yes
36	0	Ex-smoker	Yes	1597	1246	1.2817	21.9	Yes	254	36.2857		No	269	38.4286	Induction of labour	Checked	Unchecked	Unchecked	Unchecked	Unchecked	Unchecked	Unchecked	Unchecked	Unchecked	Unchecked	Unchecked	Unchecked	Unchecked	Unchecked	2.62	Female	7	Yes
28	0	Never	Yes	1437	272.9	5.26567	22.9	Yes	251	35.8571	No	No	289	41.2857	Induction of labour	Unchecked	Checked	Unchecked	Unchecked	Unchecked	Unchecked	Unchecked	Unchecked	Unchecked	Unchecked	Unchecked	Unchecked	Unchecked	Unchecked	3.06	Female	7	Yes
30	0	Never	Yes	2910	147.6	19.7154	19.1	Yes	256	36.5714	No	No	272	38.8571	Spont labour	Checked	Unchecked	Unchecked	Unchecked	Unchecked	Unchecked	Unchecked	Unchecked	Unchecked	Unchecked	Unchecked	Unchecked	Unchecked	Unchecked	2.57	Female	7.1	Yes
31	0	Ex-smoker	Yes	3093	99.61	31.0511	20.4	Yes	246	35.1429	No	No	288	41.1429	Induction of labour	Unchecked	Checked	Unchecked	Unchecked	Unchecked	Unchecked	Unchecked	Unchecked	Unchecked	Checked	Unchecked	Unchecked	Unchecked	Unchecked	3.12	Male	7.4	Yes
31	0	Never	Yes	2219	225	9.86222	18.6	Yes	254	36.2857	No	No	287	41	Spont labour	Unchecked	Unchecked	Checked	Unchecked	Unchecked	Unchecked	Unchecked	Unchecked	Unchecked	Unchecked	Unchecked	Unchecked	Unchecked	Unchecked	3.09	Male	7.4	Yes
32	4	Never	Yes	1844	241.9	7.62298	33.5	Yes	253	36.1429	No	No	272	38.8571	No labour	Unchecked	Unchecked	Unchecked	Unchecked	Unchecked	Unchecked	Unchecked	Checked	Unchecked	Unchecked	Unchecked	Unchecked	Unchecked	Unchecked	3	Male	7.7	Yes
27	1	Never	Yes	1677	129	13	26.3	Yes	251	35.8571	No	No	283	40.4286	Spont labour	Checked	Unchecked	Unchecked	Unchecked	Unchecked	Unchecked	Unchecked	Unchecked	Unchecked	Checked	Unchecked	Unchecked	Unchecked	Unchecked	3.13	Male	7.7	Yes
29	0	Ex-smoker	Yes	2635	218.5	12.0595	23.8	Yes	250	35.7143	No	No	273	39	Induction of labour	Checked	Unchecked	Unchecked	Unchecked	Unchecked	Unchecked	Unchecked	Unchecked	Unchecked	Unchecked	Unchecked	Unchecked	Unchecked	Unchecked	2.9	Male	7.7	Yes
34	1	Never	Yes	1634	416.5	3.92317	16.8	Yes	250	35.7143	No	Yes	260	37.1429	Induction of labour	Checked	Unchecked	Unchecked	Unchecked	Unchecked	Unchecked	Unchecked	Unchecked	Unchecked	Unchecked	Unchecked	Unchecked	Unchecked	Unchecked	2.36	Female	7.8	Yes
29	0	Never	Yes	3706	497.1	7.45524	19.1	Yes	252	36	No	No	263	37.5714	Induction of labour	Checked	Unchecked	Unchecked	Unchecked	Unchecked	Unchecked	Unchecked	Unchecked	Unchecked	Unchecked	Unchecked	Unchecked	Unchecked	Unchecked	2.45	Female	7.8	Yes
40	0	Current smoker	Yes	6417	129.5	49.5521	26.4	Yes	253	36.1429	No	No	270	38.5714	Spont labour	Unchecked	Unchecked	Unchecked	Unchecked	Checked	Unchecked	Unchecked	Unchecked	Unchecked	Unchecked	Unchecked	Unchecked	Unchecked	Unchecked	2.92	Male	8	Yes
31	1	Never	Yes	1620	817.8	1.98092	20.2	Yes	247	35.2857	No	No	271	38.7143	Induction of labour	Checked	Unchecked	Unchecked	Unchecked	Unchecked	Unchecked	Unchecked	Unchecked	Unchecked	Unchecked	Unchecked	Unchecked	Unchecked	Unchecked	2.62	Female	8	Yes
34	0	Never	Yes	5243	86.58	60.5567	21.4	Yes	252	36	No	No	272	38.8571	Induction of labour	Unchecked	Checked	Unchecked	Unchecked	Unchecked	Unchecked	Unchecked	Unchecked	Unchecked	Checked	Unchecked	Unchecked	Unchecked	Unchecked	2.58	Female	8	Yes
30	0	Never	Yes	2786	178	15.6517	21.9	Yes	257	36.7143	No	No	293	41.8571	Induction of labour	Unchecked	Unchecked	Unchecked	Unchecked	Checked	Unchecked	Unchecked	Unchecked	Unchecked	Unchecked	Unchecked	Unchecked	Unchecked	Unchecked	3.09	Female	8.2	Yes
36	1	Never	Yes	2248	394.7	5.69546	28.3	Yes	252	36	No	No	269	38.4286	Spont labour	Checked	Unchecked	Unchecked	Unchecked	Unchecked	Unchecked	Unchecked	Unchecked	Unchecked	Unchecked	Unchecked	Unchecked	Unchecked	Unchecked	2.91	Male	8.2	Yes
30	0	Never	Yes	3140	186.2	16.8636	28.8	Yes	251	35.8571	No	No	276	39.4286	Spont labour	Unchecked	Unchecked	Checked	Unchecked	Unchecked	Unchecked	Unchecked	Unchecked	Unchecked	Unchecked	Unchecked	Unchecked	Unchecked	Unchecked	2.89	Male	8.2	Yes
32	0	Never	Yes	1272	993.5	1.28032	21.8	Yes	254	36.2857	No	Yes	280	40	Induction of labour	Unchecked	Checked	Unchecked	Unchecked	Unchecked	Unchecked	Unchecked	Unchecked	Unchecked	Unchecked	Unchecked	Unchecked	Unchecked	Unchecked	2.9	Female	8.2	Yes
38	0	Never	Yes	Insufficient due to instrument error	123.4	#VALUE!	24.1	Yes	248	35.4286	No	No	285	40.7143	Spont labour	Unchecked	Unchecked	Unchecked	Unchecked	Checked	Unchecked	Unchecked	Unchecked	Unchecked	Unchecked	Unchecked	Unchecked	Unchecked	Unchecked	3.16	Male	8.5	Yes
36	6	Never	Yes	1682	265.4	6.3376	30.7	Yes	250	35.7143	No	No	273	39	Spont labour	Checked	Unchecked	Unchecked	Unchecked	Unchecked	Unchecked	Unchecked	Unchecked	Unchecked	Unchecked	Unchecked	Unchecked	Unchecked	Unchecked	2.98	Female	8.5	Yes
34	0	Never	Yes	2051	336.2	6.10054	29.2	Yes	256	36.5714	No	No	287	41	Spont labour	Unchecked	Checked	Unchecked	Unchecked	Unchecked	Unchecked	Unchecked	Unchecked	Unchecked	Unchecked	Unchecked	Unchecked	Unchecked	Unchecked	3.14	Male	8.5	Yes
38	1	Ex-smoker	Yes	3741	178.9	20.9111	23	Yes	254	36.2857	No	Yes	273	39	No labour	Unchecked	Unchecked	Unchecked	Unchecked	Unchecked	Unchecked	Unchecked	Checked	Unchecked	Unchecked	Unchecked	Unchecked	Unchecked	Unchecked	2.83	Female	8.6	Yes
40	0	Never	Yes	2236	157	14.242	30.1	Yes	245	35	No	No	286	40.8571	Induction of labour	Unchecked	Checked	Checked	Unchecked	Unchecked	Unchecked	Unchecked	Unchecked	Unchecked	Unchecked	Unchecked	Unchecked	Unchecked	Unchecked	3.2	Female	8.7	Yes
32	1	Never	Yes	3377	719.3	4.69484	19.8	Yes	256	36.5714	No	No	268	38.2857	Spont labour	Checked	Unchecked	Unchecked	Unchecked	Unchecked	Unchecked	Unchecked	Unchecked	Unchecked	Unchecked	Unchecked	Unchecked	Unchecked	Unchecked	2.7	Male	8.7	Yes
29	0	Never	Yes	2133	276.8	7.70592	17.1	Yes	256	36.5714	No	No	285	40.7143	Spont labour	Checked	Unchecked	Unchecked	Unchecked	Unchecked	Unchecked	Unchecked	Unchecked	Unchecked	Unchecked	Unchecked	Unchecked	Unchecked	Unchecked	2.84	Female	8.7	Yes
36	1	Never	Yes	2301	1039	2.21463	20.5	Yes	247	35.2857	No	No	249	35.5714	No labour	Unchecked	Unchecked	Unchecked	Unchecked	Unchecked	Unchecked	Checked	Unchecked	Unchecked	Unchecked	Unchecked	Unchecked	Unchecked	Unchecked	2.22	Male	8.8	Yes
37	1	Never	Yes	3801	103	36.9029	22.2	Yes	250	35.7143	No	No	257	36.7143	Spont labour	Unchecked	Unchecked	Unchecked	Unchecked	Checked	Unchecked	Unchecked	Unchecked	Unchecked	Unchecked	Unchecked	Unchecked	Unchecked	Unchecked	2.44	Female	8.8	Yes
33	1	Never	Yes	3143	139.6	22.5143	24.2	Yes	256	36.5714	No	No	277	39.5714	Spont labour	Checked	Unchecked	Unchecked	Unchecked	Unchecked	Unchecked	Unchecked	Unchecked	Unchecked	Unchecked	Unchecked	Unchecked	Unchecked	Unchecked	2.97	Male	8.8	Yes
31	0	Never	Yes	5596	506.4	11.0506	22.7	Yes	248	35.4286	No	Yes	271	38.7143	Induction of labour	Unchecked	Checked	Unchecked	Unchecked	Unchecked	Unchecked	Unchecked	Unchecked	Unchecked	Unchecked	Unchecked	Unchecked	Unchecked	Unchecked	2.62	Female	8.9	Yes
41	3	Current smoker	Yes				31.2	Yes	256	36.5714	No	No	277	39.5714	Spont labour	Checked	Unchecked	Unchecked	Unchecked	Unchecked	Unchecked	Unchecked	Unchecked	Unchecked	Checked	Unchecked	Unchecked	Unchecked	Unchecked	2.97	Female	9	Yes
37	0	Current smoker	Yes	4224	220.4	19.1652	28.3	Yes	251	35.8571	No	No	278	39.7143	Induction of labour	Unchecked	Checked	Unchecked	Unchecked	Unchecked	Unchecked	Unchecked	Unchecked	Unchecked	Unchecked	Unchecked	Unchecked	Unchecked	Unchecked	2.95	Female	9.2	Yes
35	2	Never	Yes	4781	1007	4.74777	20.5	Yes	246	35.1429	No	Yes	250	35.7143	Spont labour	Checked	Unchecked	Unchecked	Unchecked	Unchecked	Unchecked	Unchecked	Unchecked	Unchecked	Unchecked	Unchecked	Unchecked	Unchecked	Unchecked	2.28	Male	9.35	Yes
37	1	Never	Yes	2620	1099	2.38399	22.8	Yes	248	35.4286	No	No	270	38.5714	Induction of labour	Checked	Unchecked	Unchecked	Unchecked	Unchecked	Unchecked	Unchecked	Unchecked	Unchecked	Unchecked	Unchecked	Unchecked	Unchecked	Unchecked	2.66	Female	9.4	Yes
32	0	Never	Yes	4189	72.01	58.1725	22.6	Yes	255	36.4286	No	No	270	38.5714	Spont labour	Unchecked	Unchecked	Checked	Unchecked	Unchecked	Unchecked	Unchecked	Unchecked	Unchecked	Unchecked	Unchecked	Unchecked	Unchecked	Unchecked	2.57	Female	9.5	Yes
22	2	Current smoker	Yes	5165	120.1	43.0058	19.6	Yes	257	36.7143	No	No	291	41.5714	Induction of labour	Unchecked	Unchecked	Unchecked	Unchecked	Checked	Unchecked	Unchecked	Unchecked	Unchecked	Unchecked	Unchecked	Unchecked	Unchecked	Unchecked	3.14	Female	9.6	Yes
37	1	Never	Yes	2139	523.7	4.0844	21.5	Yes	257	36.7143	No	No	276	39.4286	Spont labour	Checked	Unchecked	Unchecked	Unchecked	Unchecked	Unchecked	Unchecked	Unchecked	Unchecked	Unchecked	Unchecked	Unchecked	Unchecked	Unchecked	3.09	Male	9.6	Yes
34	1	Never	Yes	1604	246.5	6.5071	24.6	Yes	253	36.1429	No	No	284	40.5714	Induction of labour	Checked	Unchecked	Unchecked	Unchecked	Unchecked	Unchecked	Unchecked	Unchecked	Unchecked	Unchecked	Unchecked	Unchecked	Unchecked	Unchecked	3.03	Female	9.6	Yes
27	0	Never	Yes	1872	131.4	14.2466	26	Yes	256	36.5714	No	No	290	41.4286	Induction of labour	Unchecked	Unchecked	Checked	Unchecked	Unchecked	Unchecked	Unchecked	Unchecked	Unchecked	Unchecked	Unchecked	Unchecked	Unchecked	Unchecked	3.26	Male	9.6	Yes
31	2	Never	Yes	3476	178	19.5281	28.6	Yes	252	36	No	No	272	38.8571	Spont labour	Unchecked	Unchecked	Unchecked	Unchecked	Unchecked	Unchecked	Checked	Unchecked	Unchecked	Unchecked	Unchecked	Unchecked	Unchecked	Unchecked	2.99	Male	9.7	Yes
28	0	Ex-smoker	Yes	1852	111.5	16.6099	26.8	Yes	255	36.4286	No	No	278	39.7143	Induction of labour	Checked	Unchecked	Unchecked	Unchecked	Unchecked	Unchecked	Unchecked	Unchecked	Unchecked	Unchecked	Unchecked	Unchecked	Unchecked	Unchecked	3.17	Male	9.7	Yes
